# Supplementary material for: Synthesis, Biological and In Silico Studies of Griseofulvin and Usnic Acid Sulfonamide Derivatives as Fungal, Bacterial and Human Carbonic Anhydrase Inhibitors
Source: MDPI journal article supplement (doi:10.3390/ijms24032802), 2023-02-01
Supplement: s1 [file s1]

# Synthesis, Biological and In Silico Studies of Griseofulvin and usnic acid sulfonamide derivatives as Carbonic Anhydrase Inhibitors

Andrea Angeli <sup>1,2</sup>, Victor Kartsev <sup>3</sup>, Anthi Petrou <sup>4</sup>, Boris Lichitsky <sup>5</sup>, Andrey Komogortsev <sup>5</sup>, Clemente Capasso <sup>2</sup>, Athina Geronikaki <sup>4,\*</sup> and Claudiu T. Supuran <sup>1,\*</sup>

<sup>1</sup> NeuroFarba Department, Sezione di Scienze Farmaceutiche, Università degli Studi di Firenze,  
Via Ugo Schiff 6, 50019 Sesto Fiorentino, Italy

<sup>2</sup> Istituto di Bioscienze e Biorisorse, CNR, Via Pietro Castellino 111, 80131 Napoli, Italy.

<sup>3</sup> InterBioScreen, 142432 Chernogolovka, Russia

<sup>4</sup> Department of Pharmacy, School of Health, Aristotle University of Thessaloniki,  
54124 Thessaloniki, Greece;

<sup>5</sup> Zelinsky Institute of Organic Chemistry, Leninsky Prospect, 119991 Moscow, Russia;

\* Correspondence: [geronik@pharm.auth.gr](mailto:geronik@pharm.auth.gr); [claudiu.supuran@unifi.it](mailto:claudiu.supuran@unifi.it)

## <sup>1</sup>H-NMR and <sup>13</sup>C-NMR of compounds

# Compound 1a

STOCK1N-96484

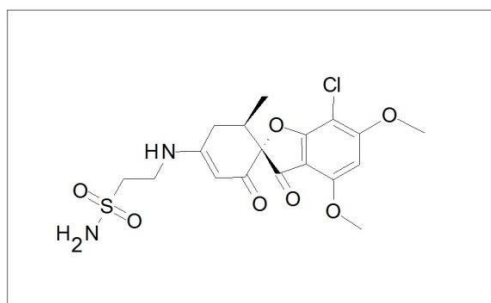

G72780  
MAVAS-212269

C18H21ClN2O7S

444.89

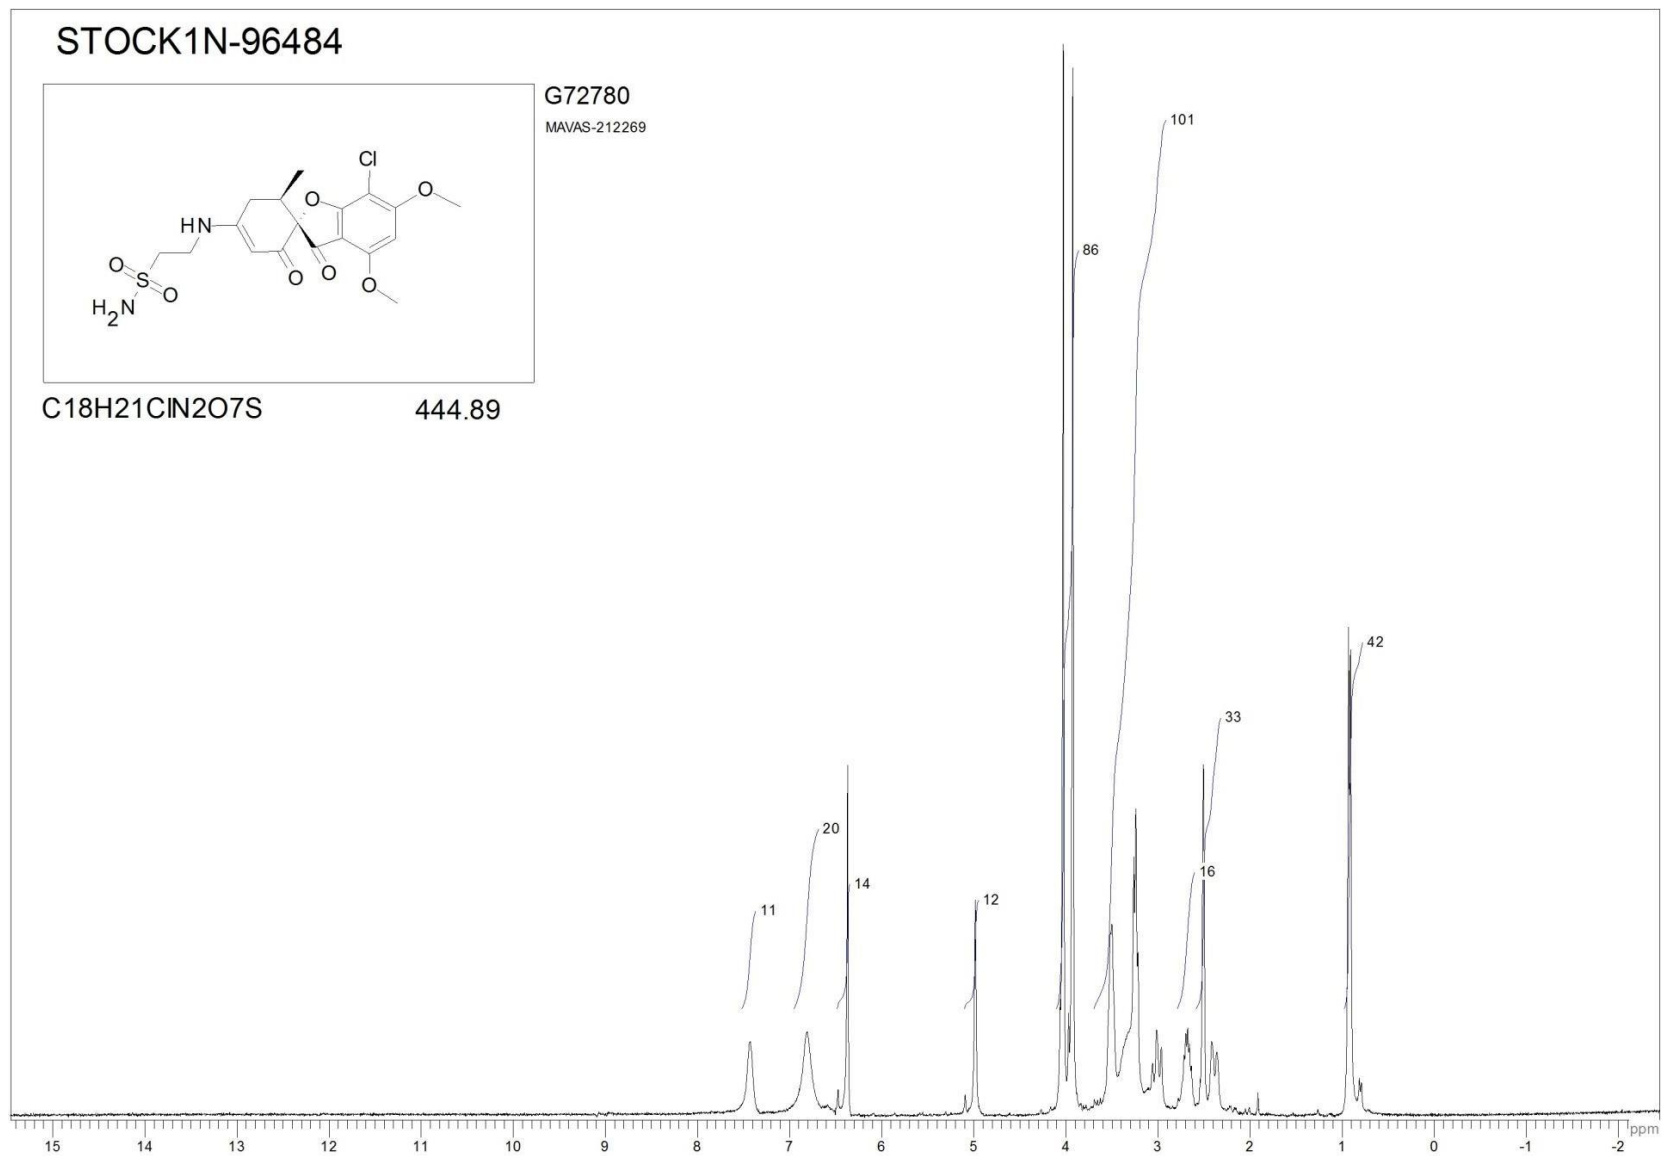

CARBON\_01  
16-COMP-96484

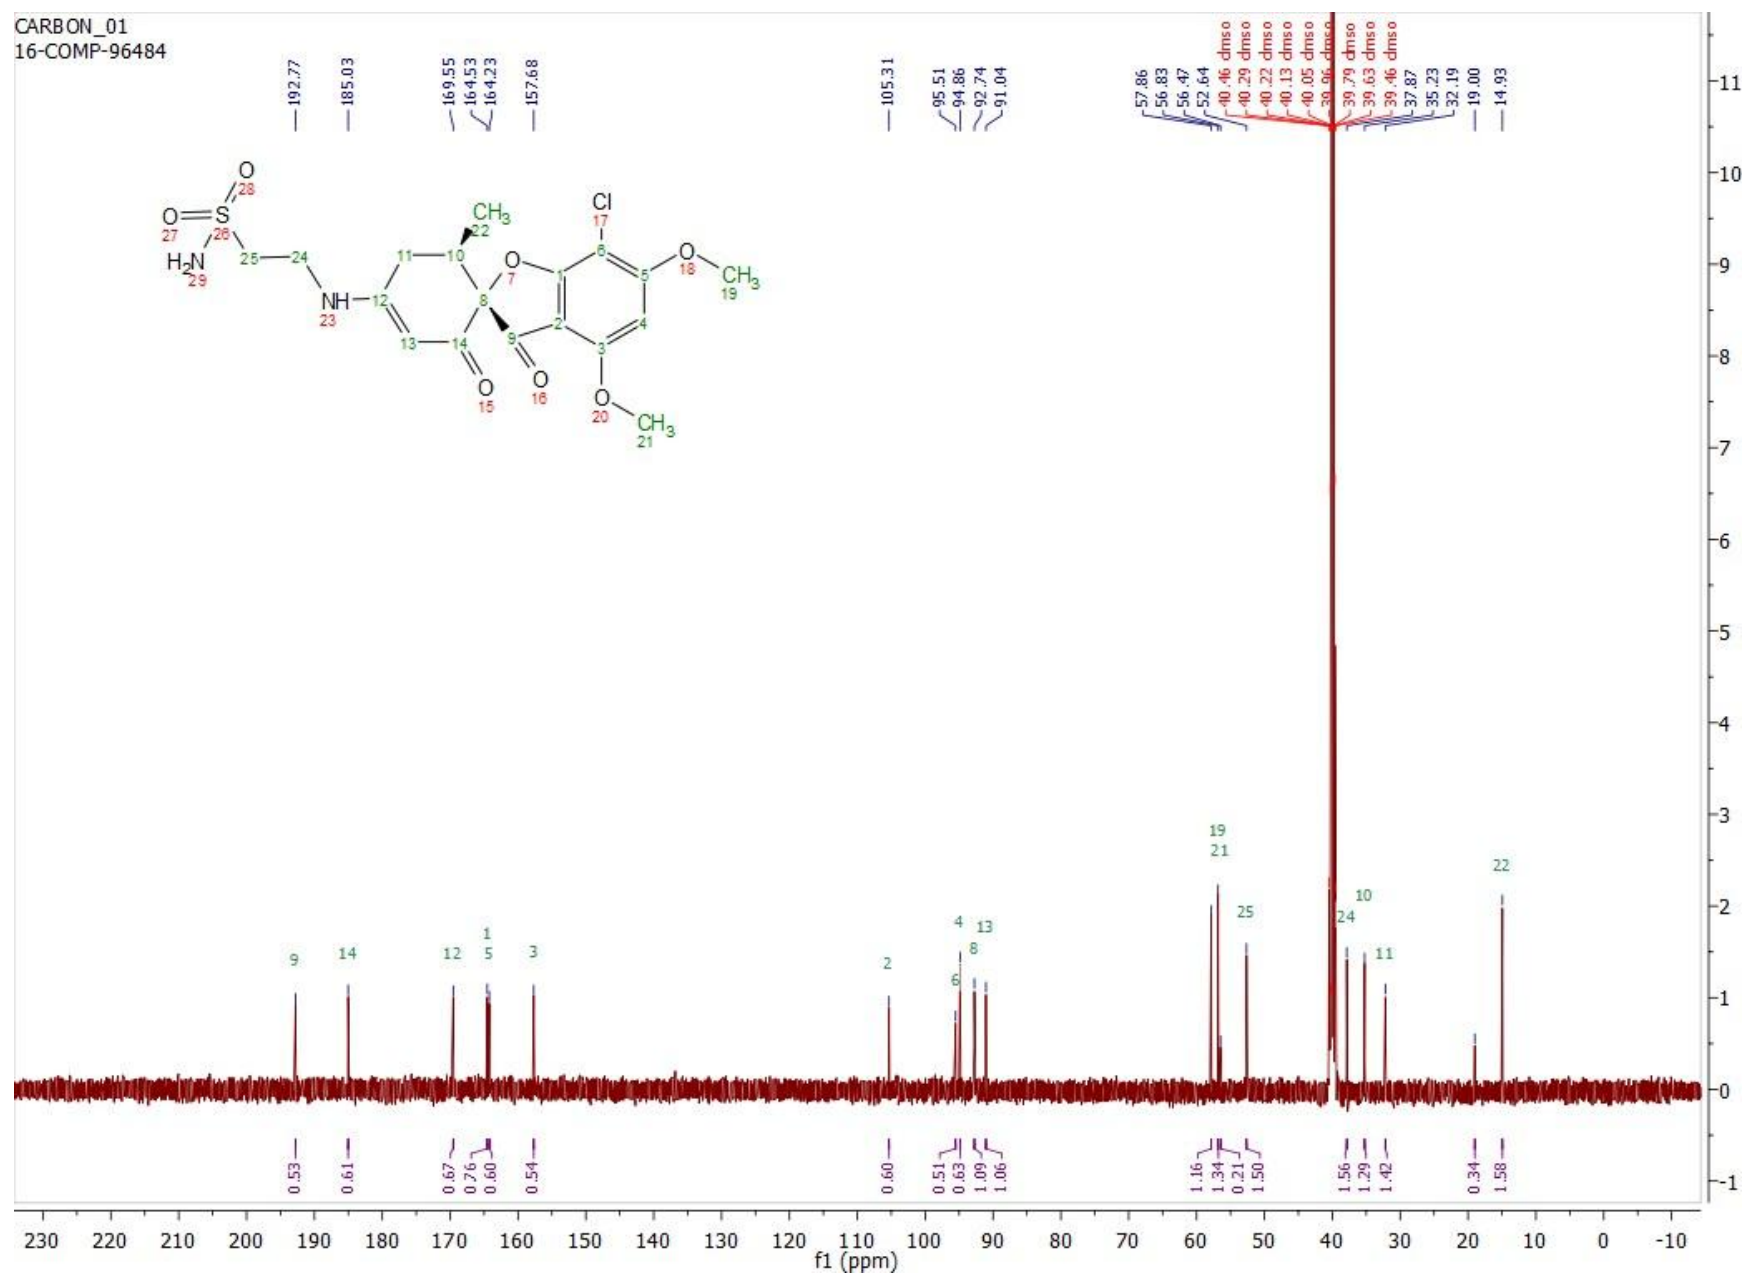

### Compound 1b

STOCK1N-95471

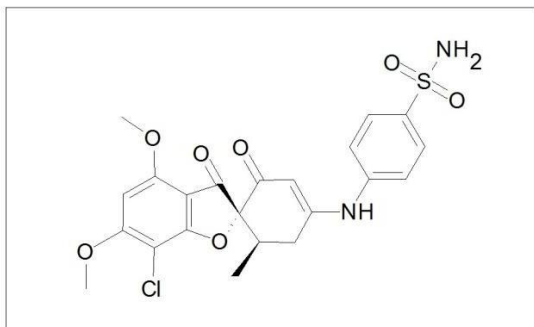

G71313  
MAVAS-204496

C22H21ClN2O7S

492.94

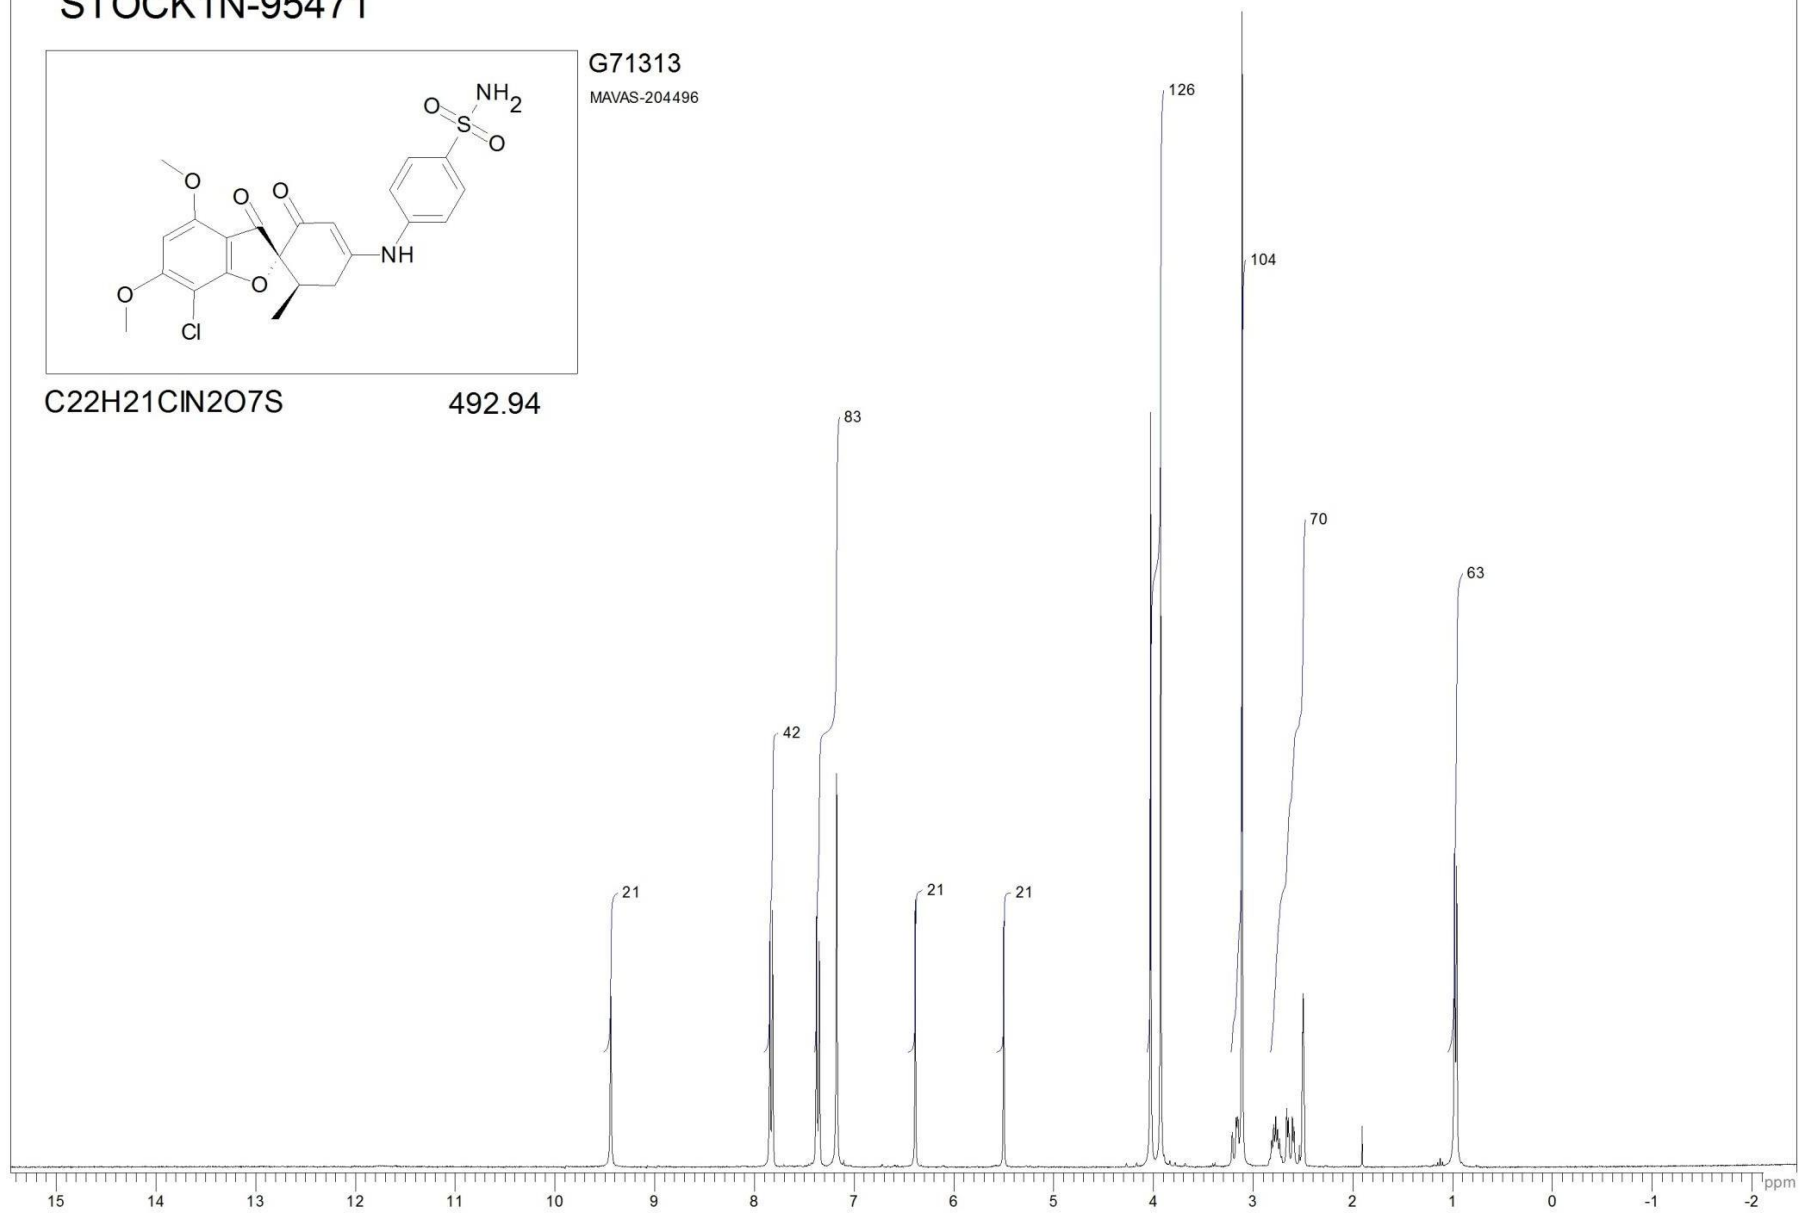

CARBON\_01  
1N-9647116COP

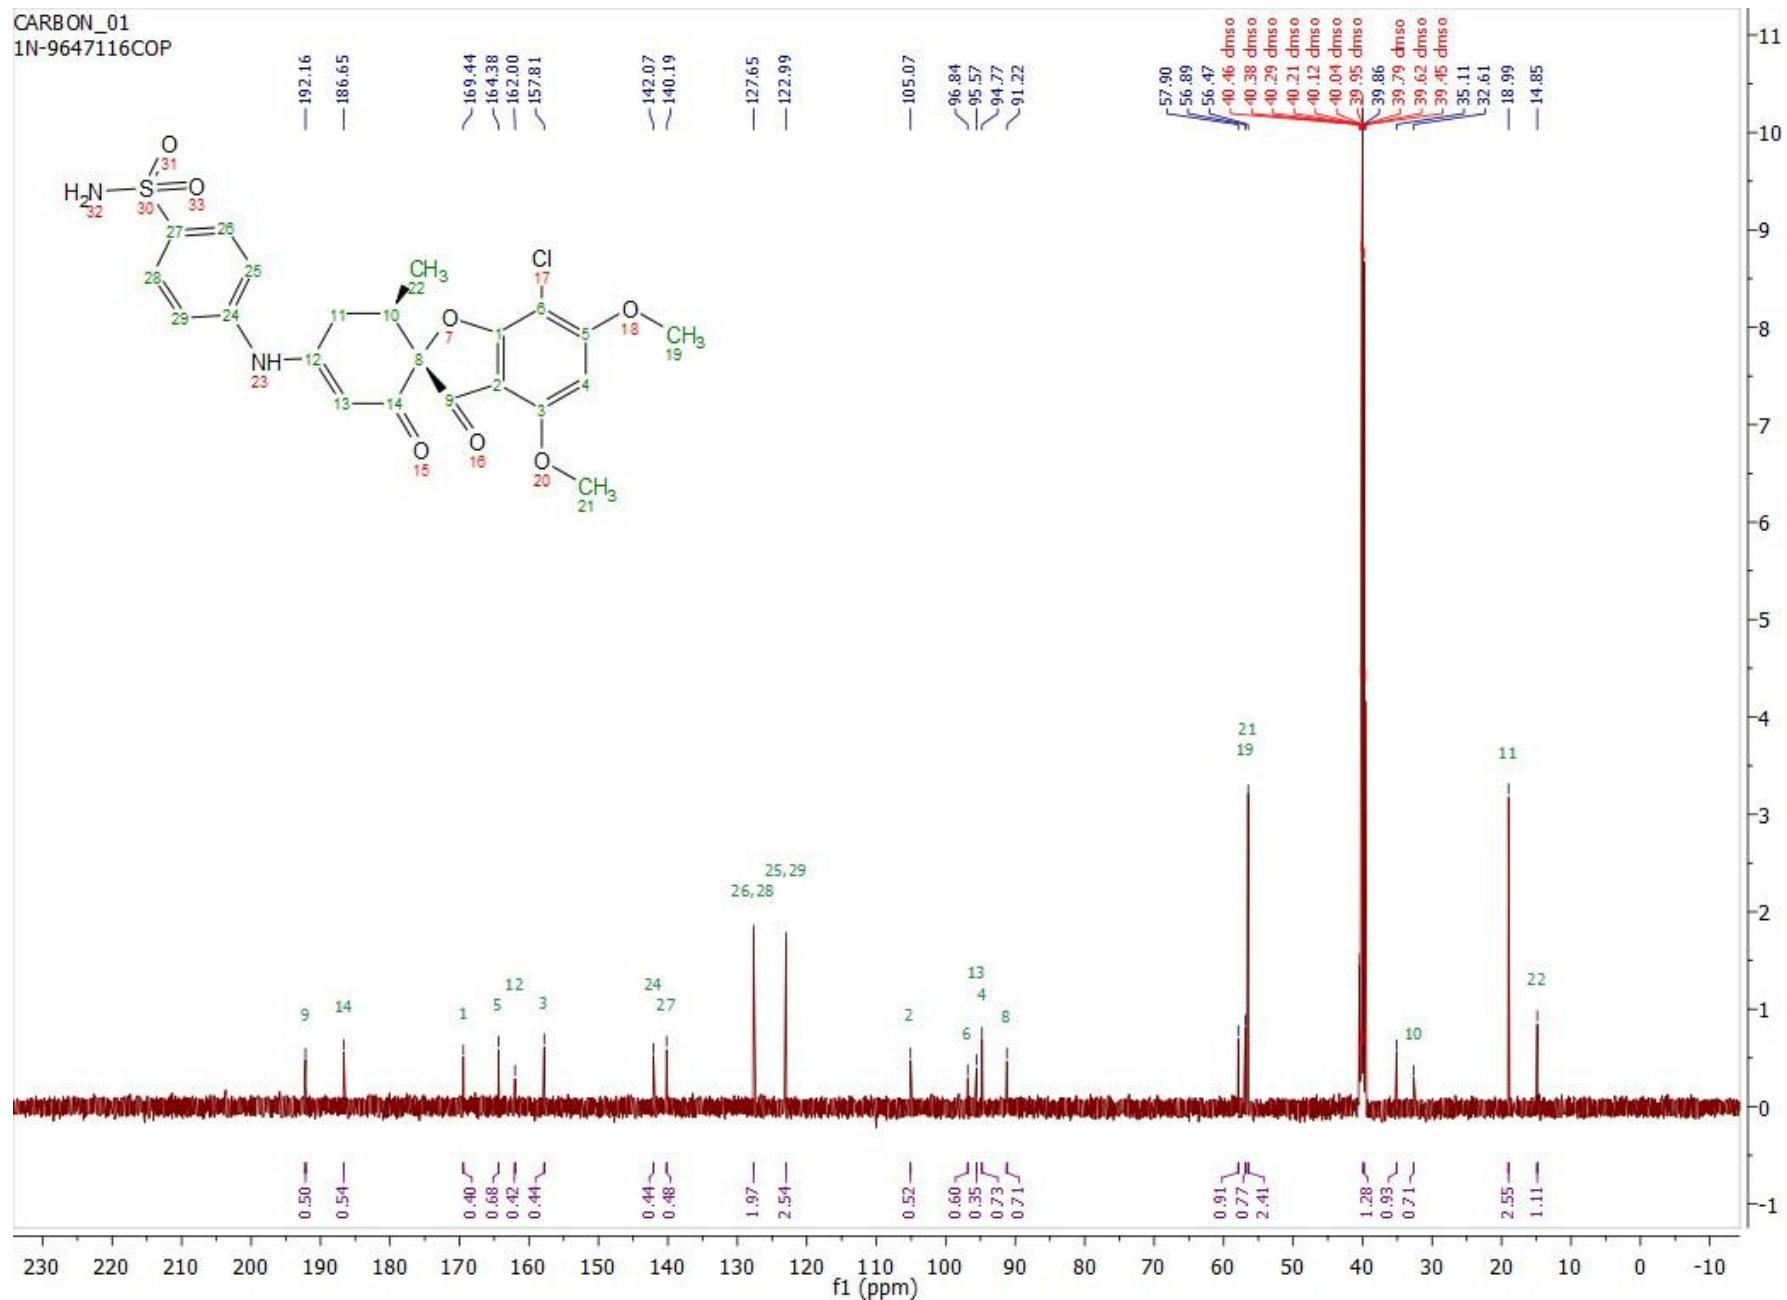

Compound 1c

STOCK1N-96417

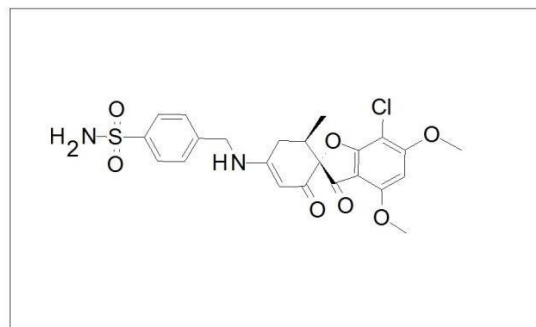

G73641  
MAVAS-211760

C23H23ClN2O7S

506.96

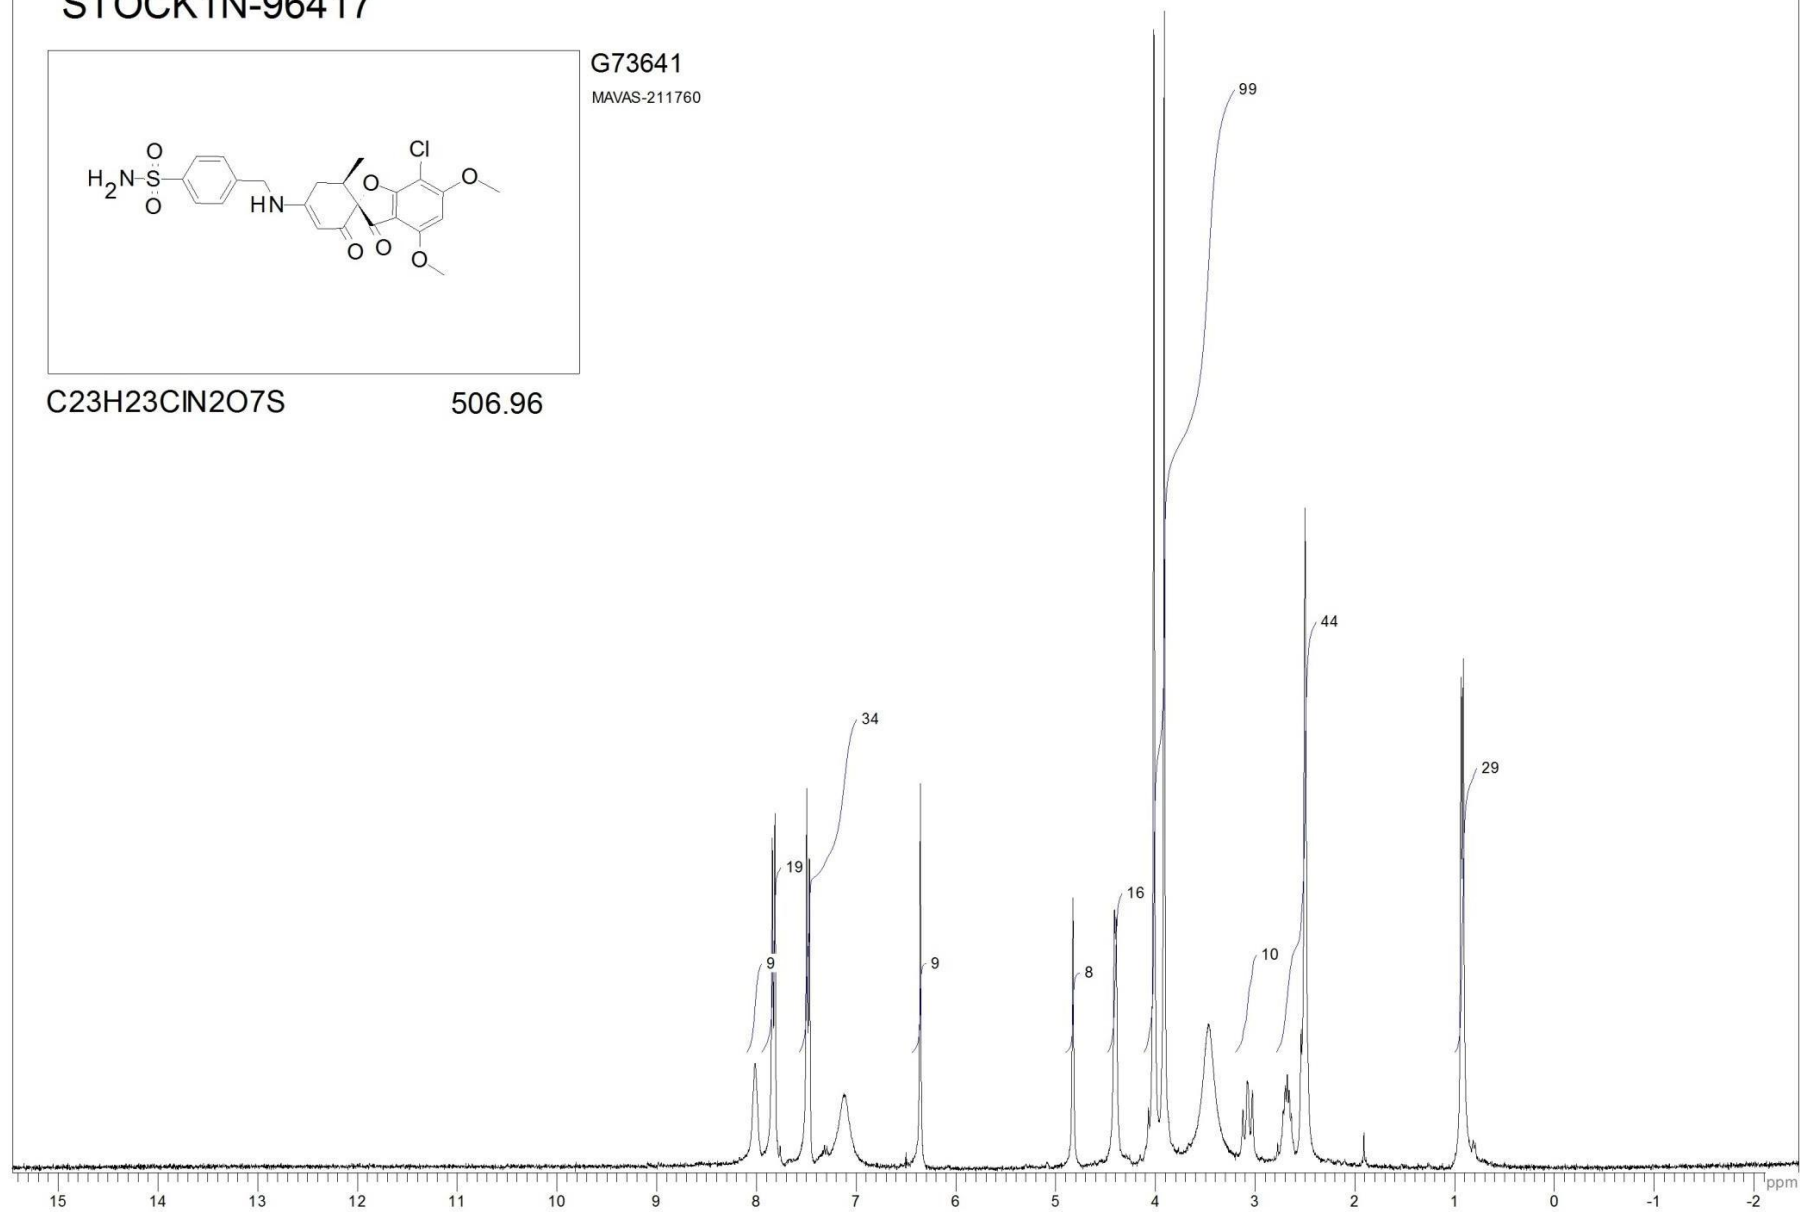

CARBON\_01  
1N-9647116COP

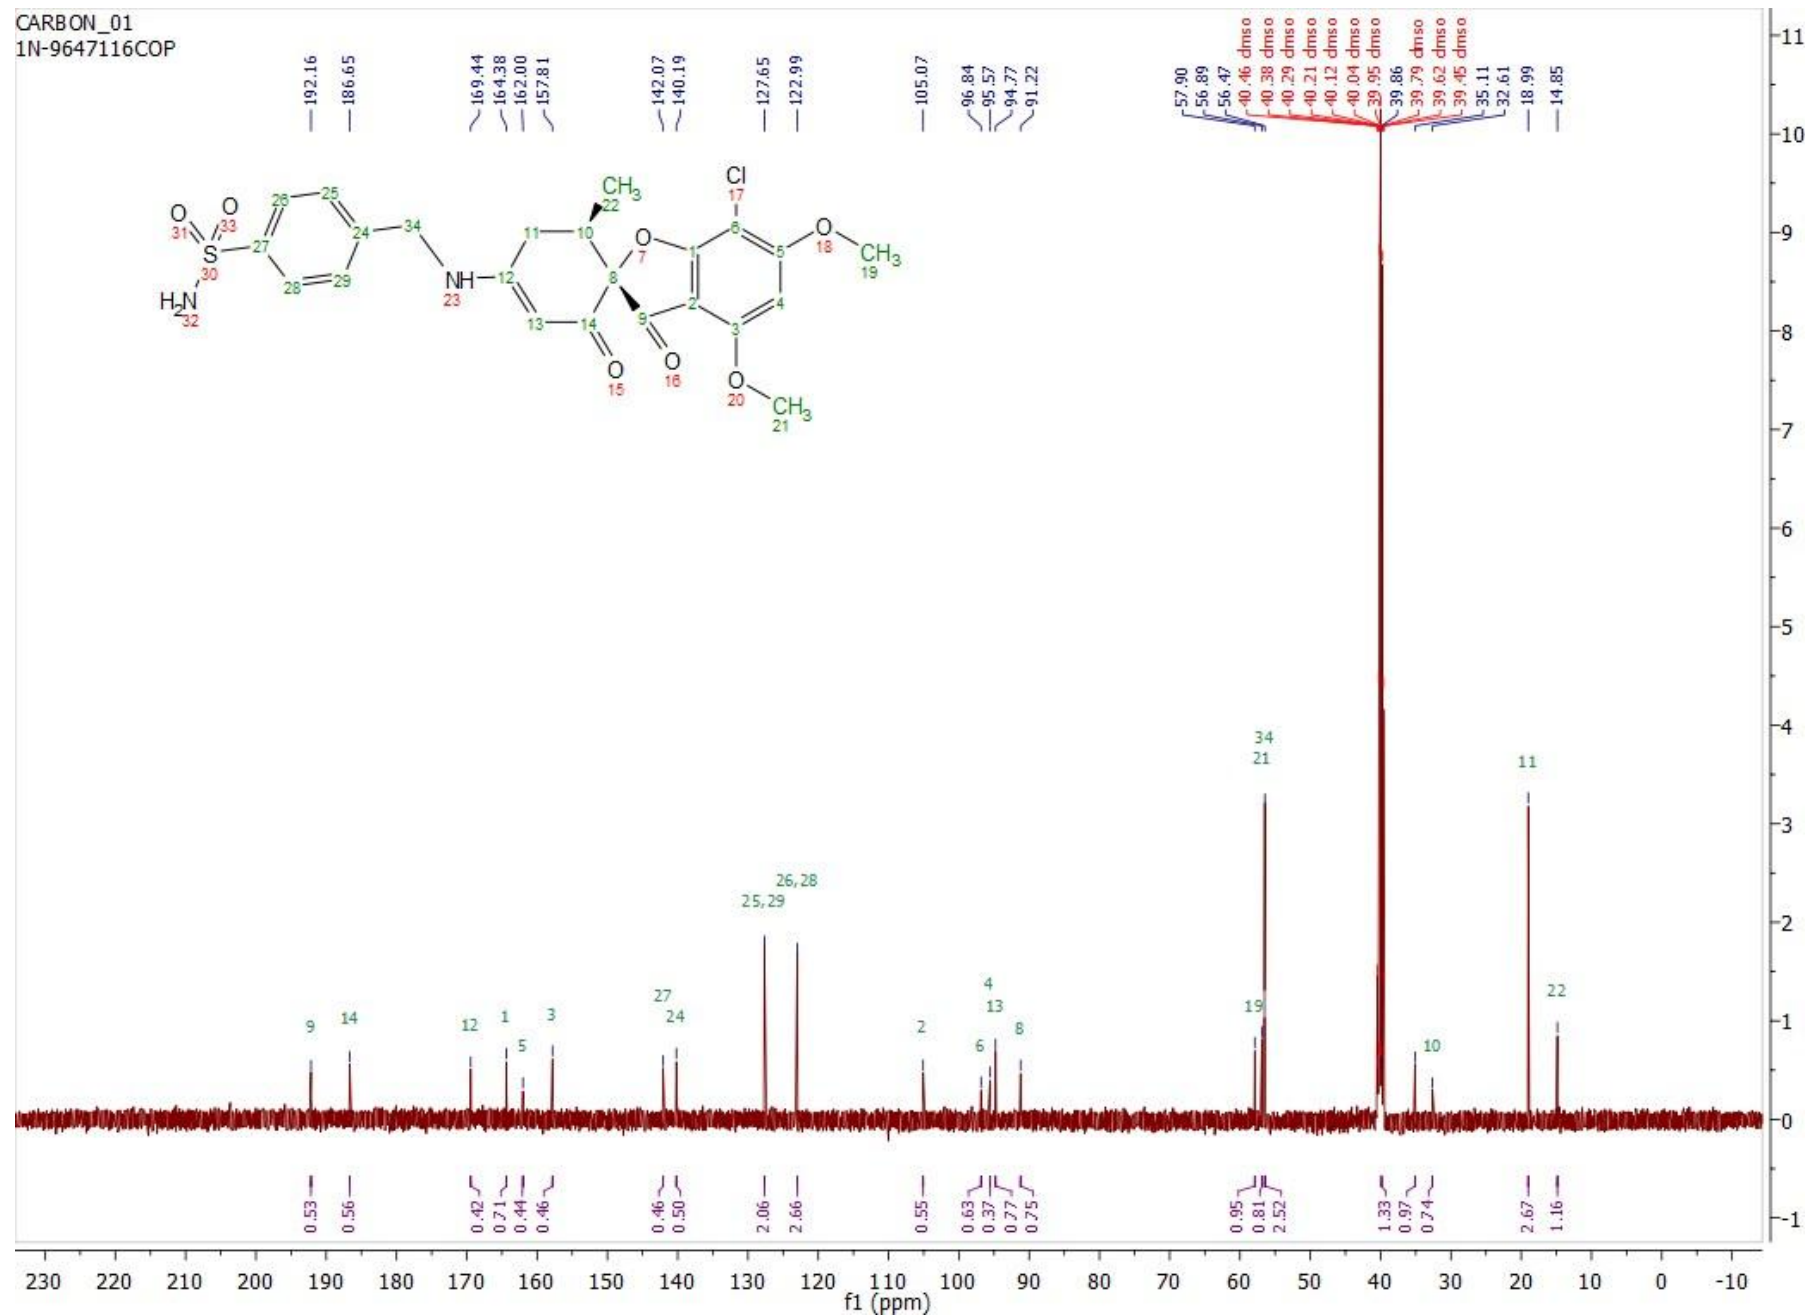

Compound 1d

STOCK1N-95963

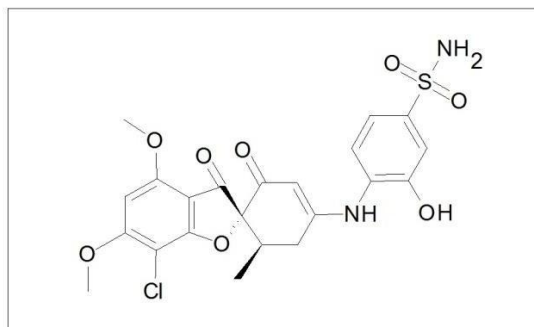

G72472  
MAVAS-205155

C<sub>22</sub>H<sub>21</sub>ClN<sub>2</sub>O<sub>8</sub>S

508.94

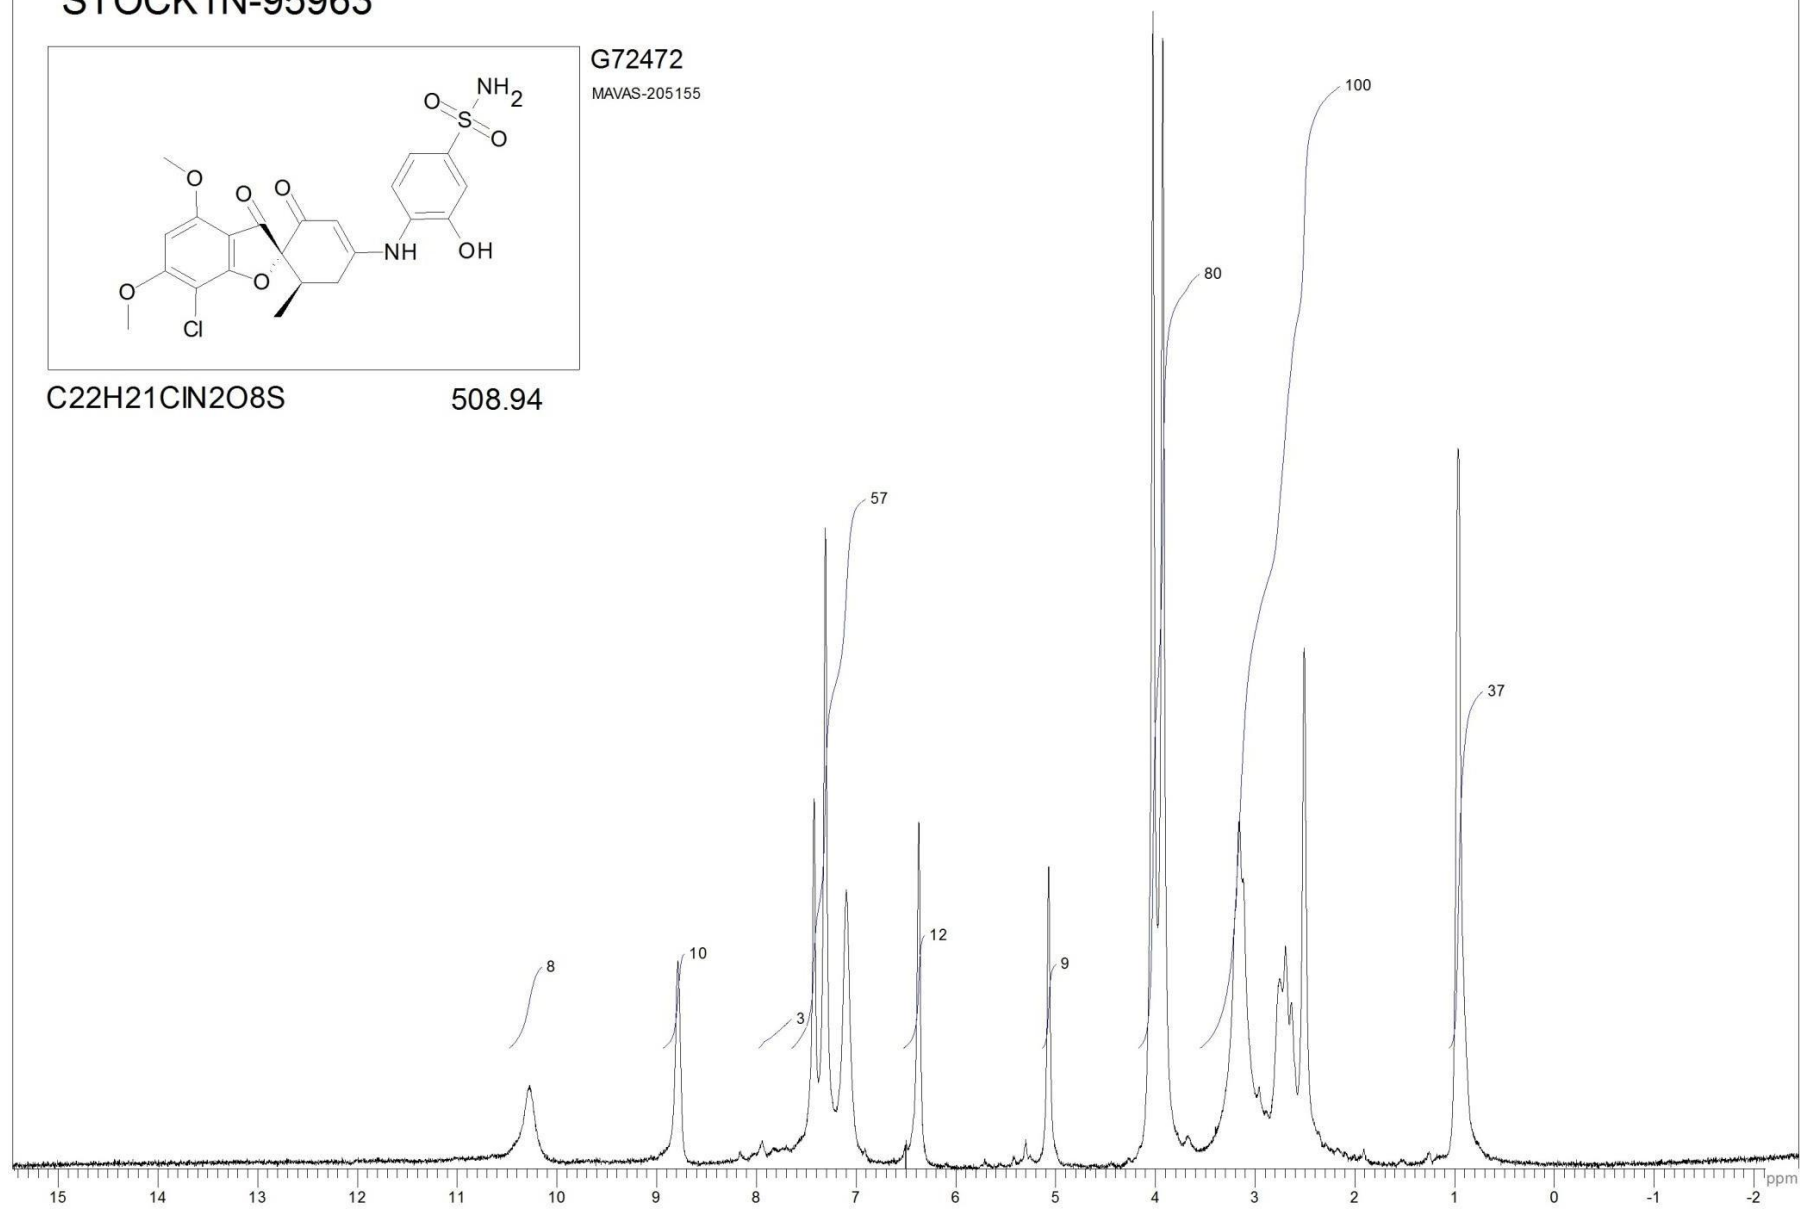

CARBON\_01  
95963-16amp

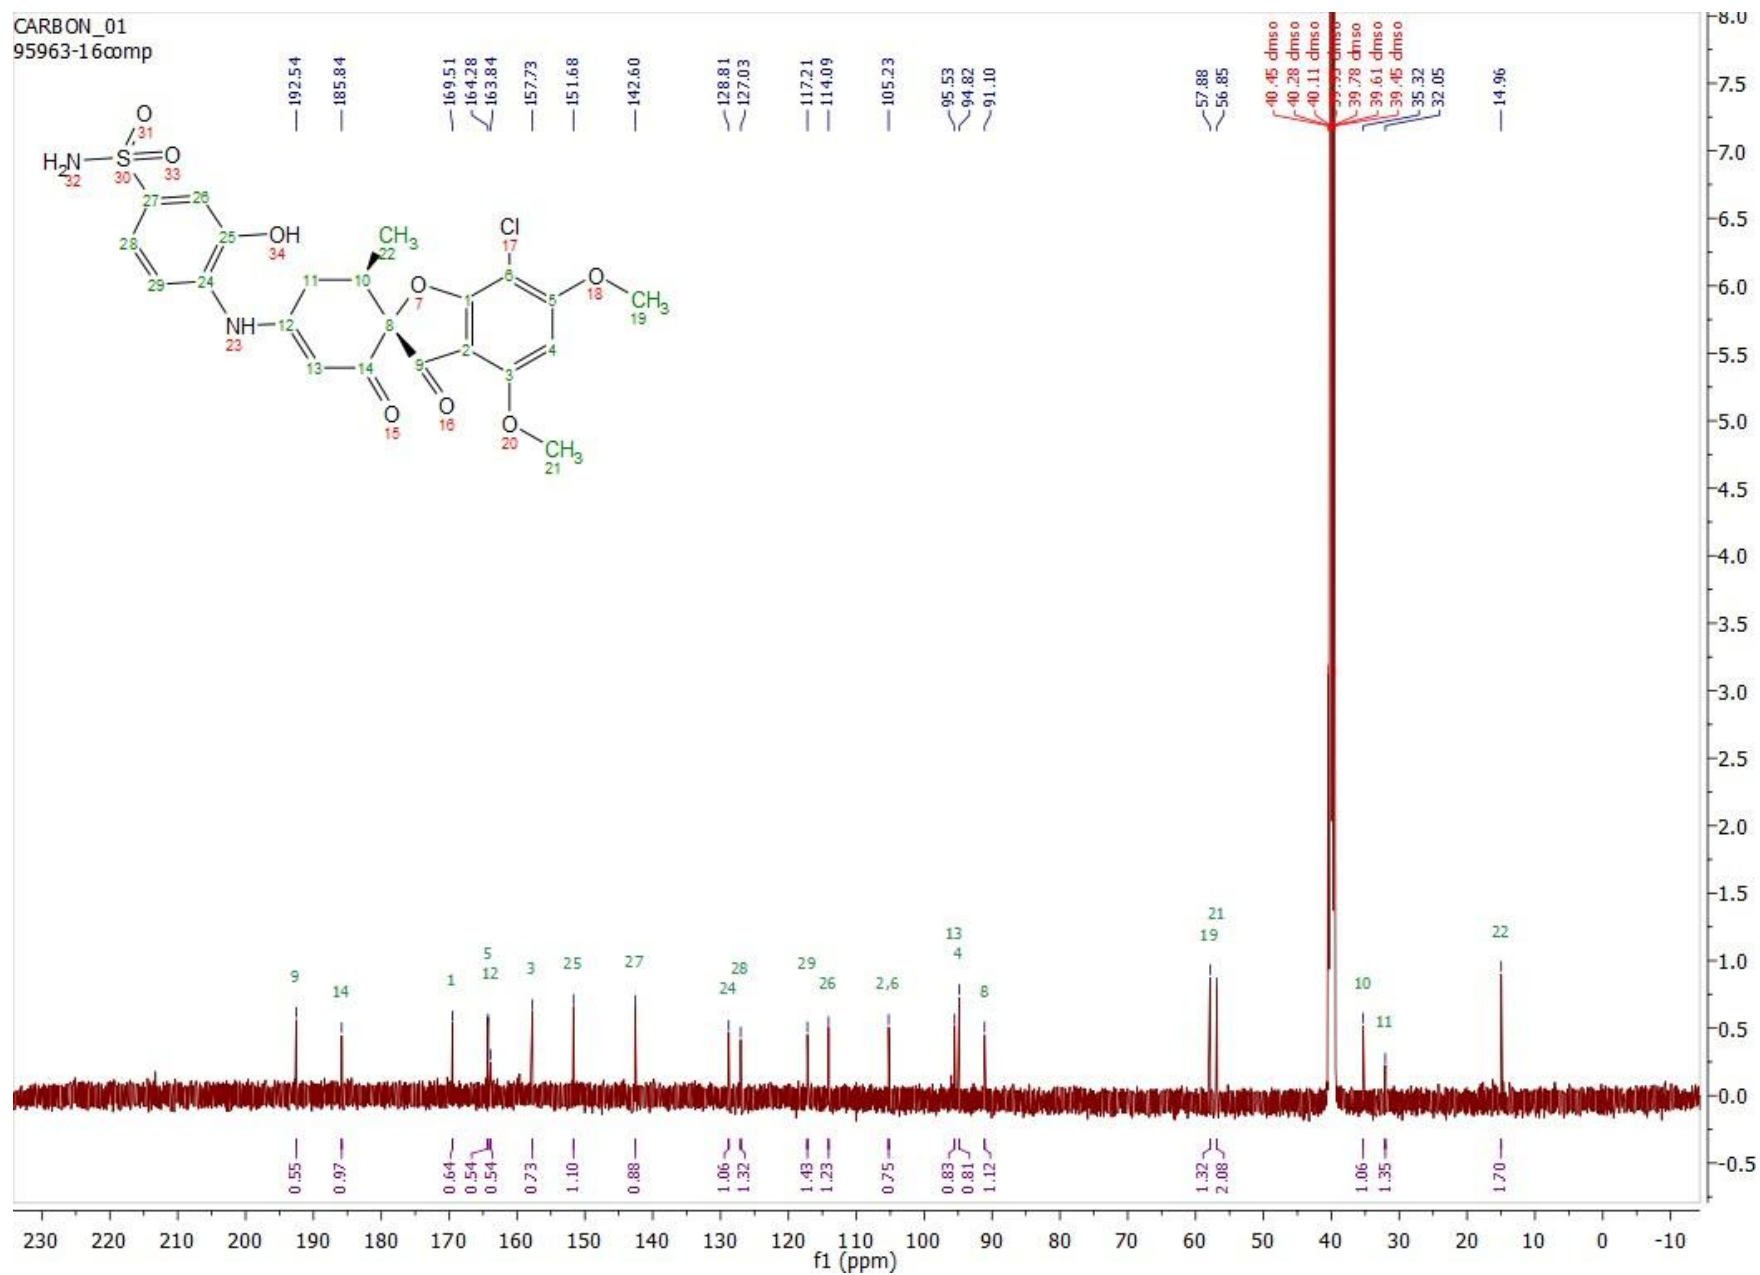

Compound 1e

STOCK1N-98537

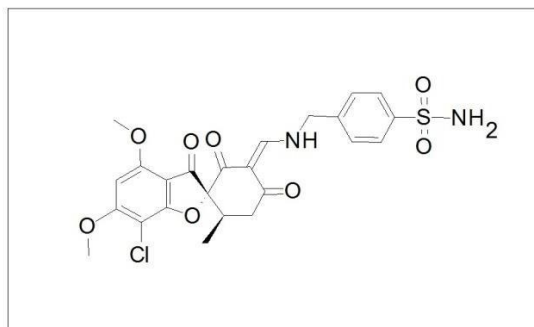

G75973

MAVAS-223183

C<sub>24</sub>H<sub>23</sub>ClN<sub>2</sub>O<sub>8</sub>S

534.97

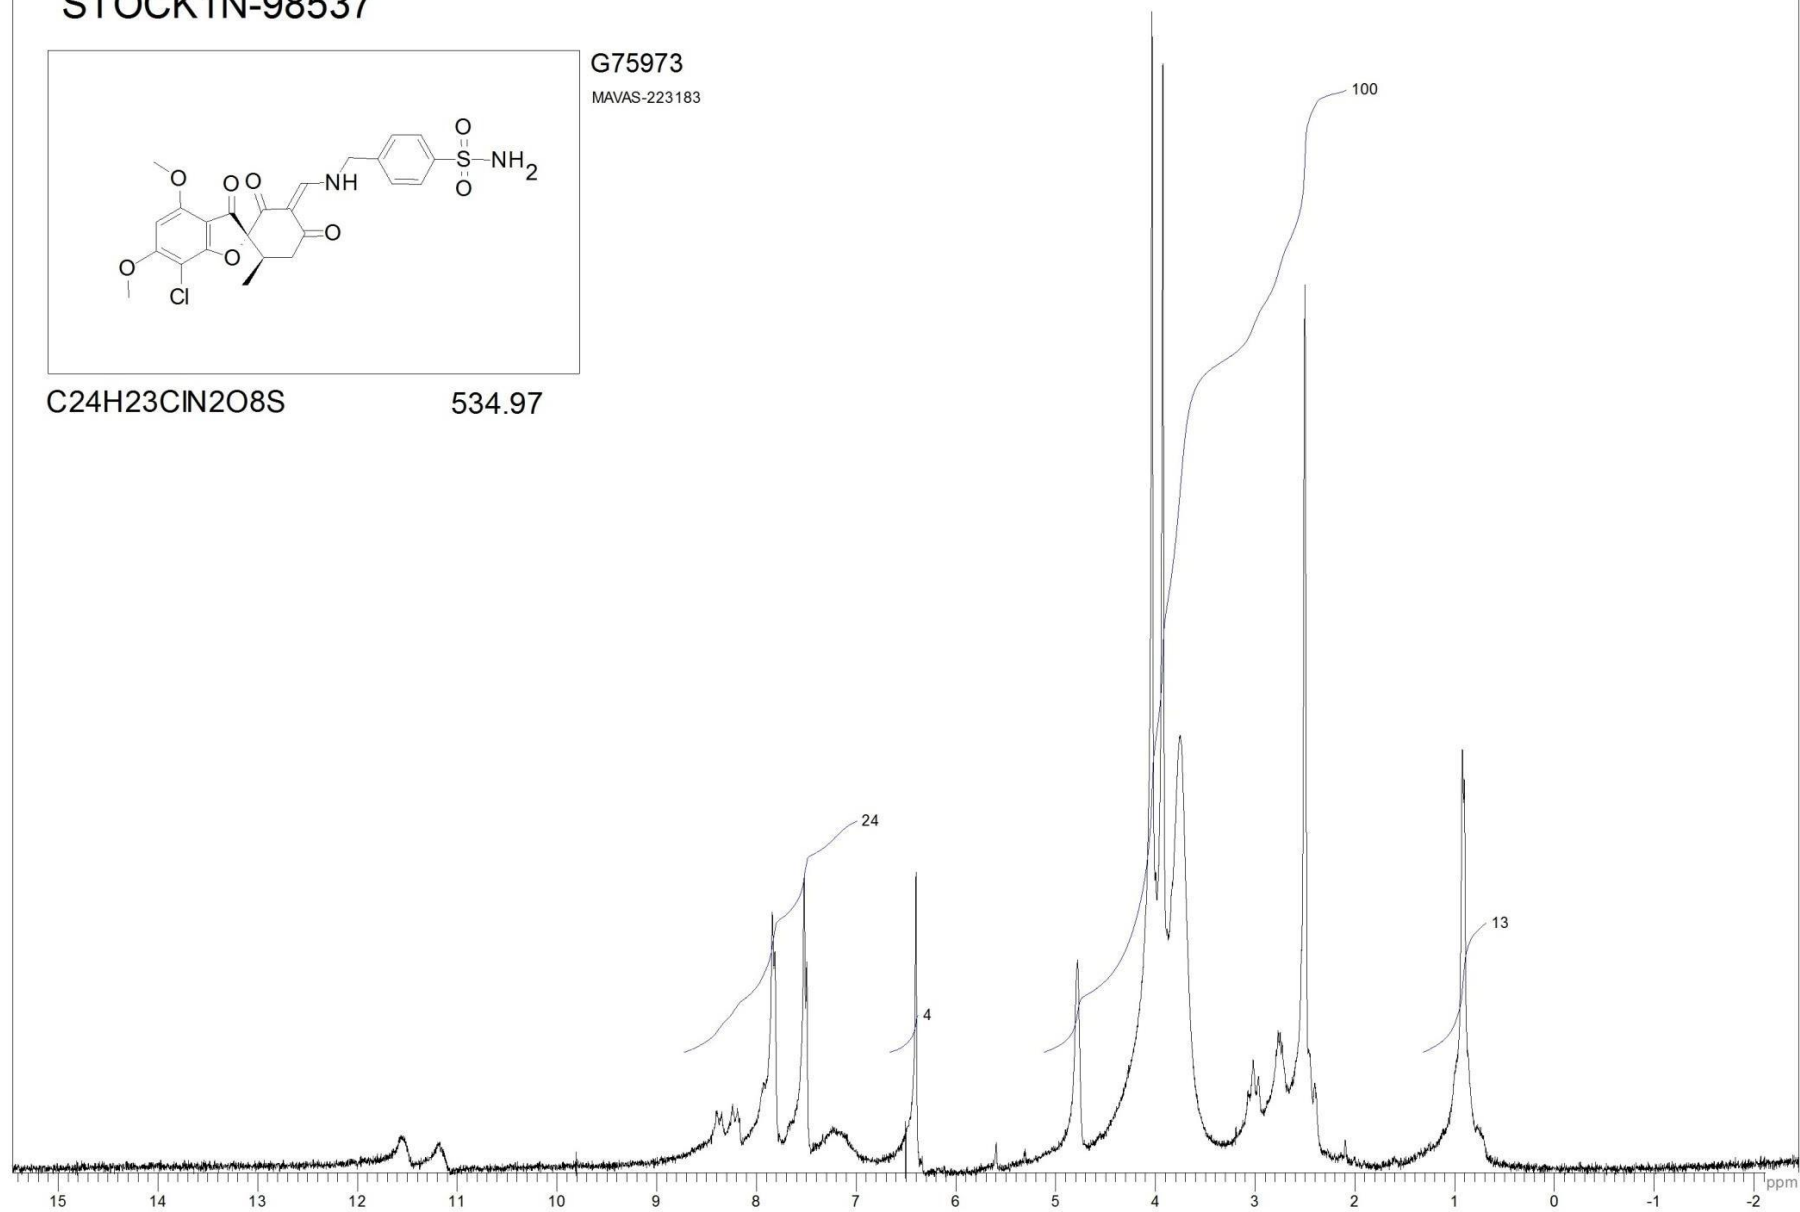

CARBON\_01  
in-98537

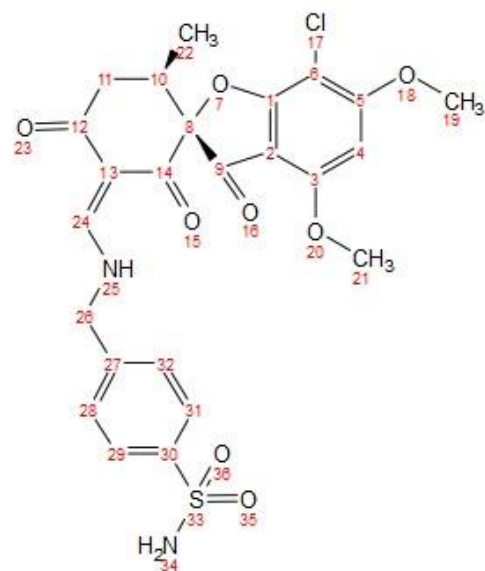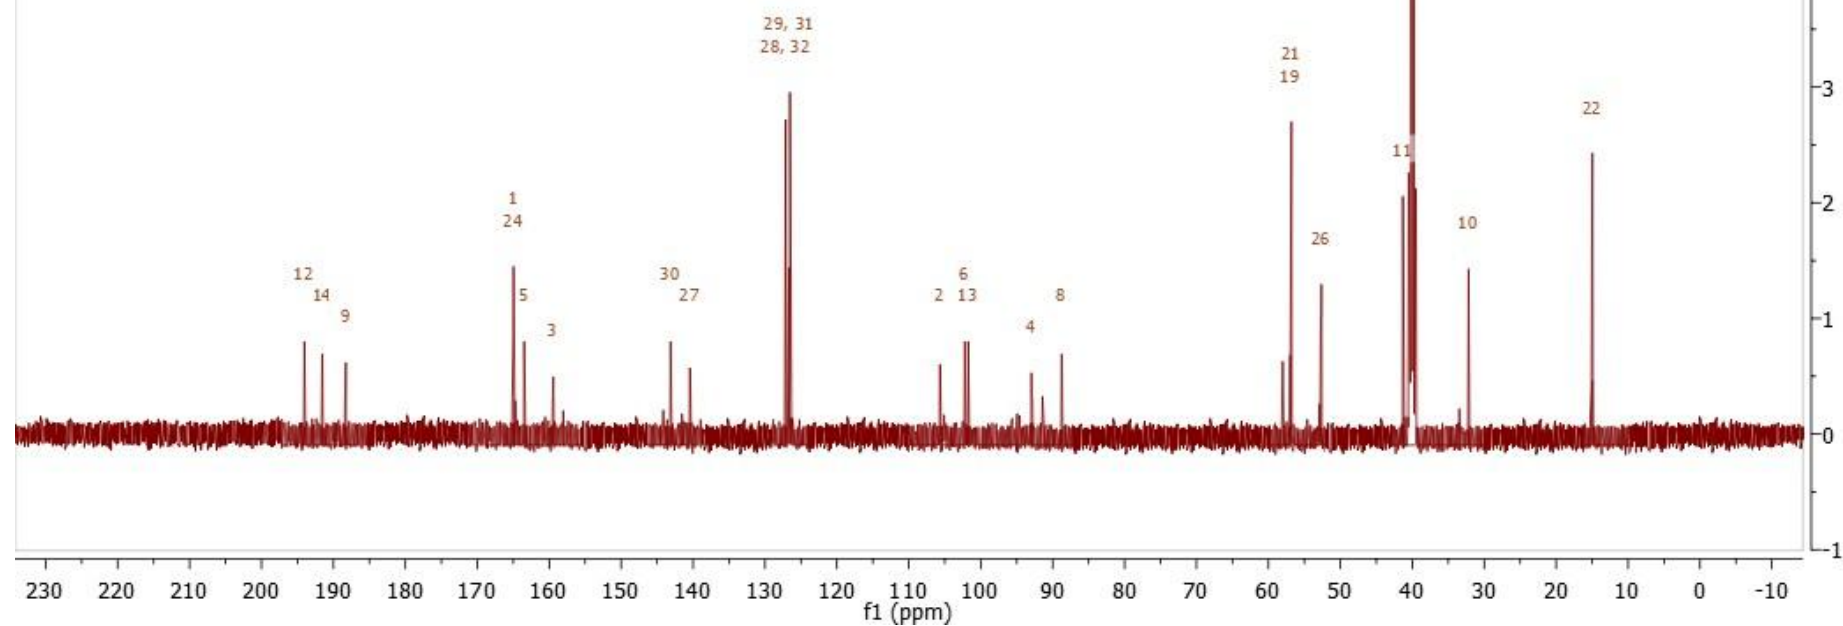

Compound 1f

STOCK1N-97860

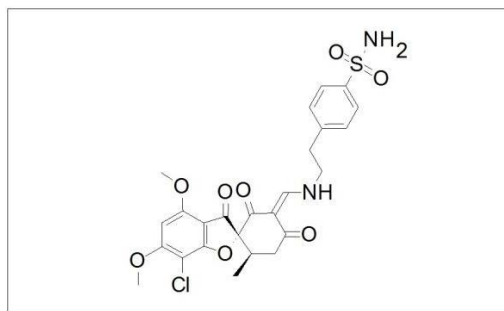

G75678

MAVAS-223180

C<sub>25</sub>H<sub>25</sub>ClN<sub>2</sub>O<sub>8</sub>S

549

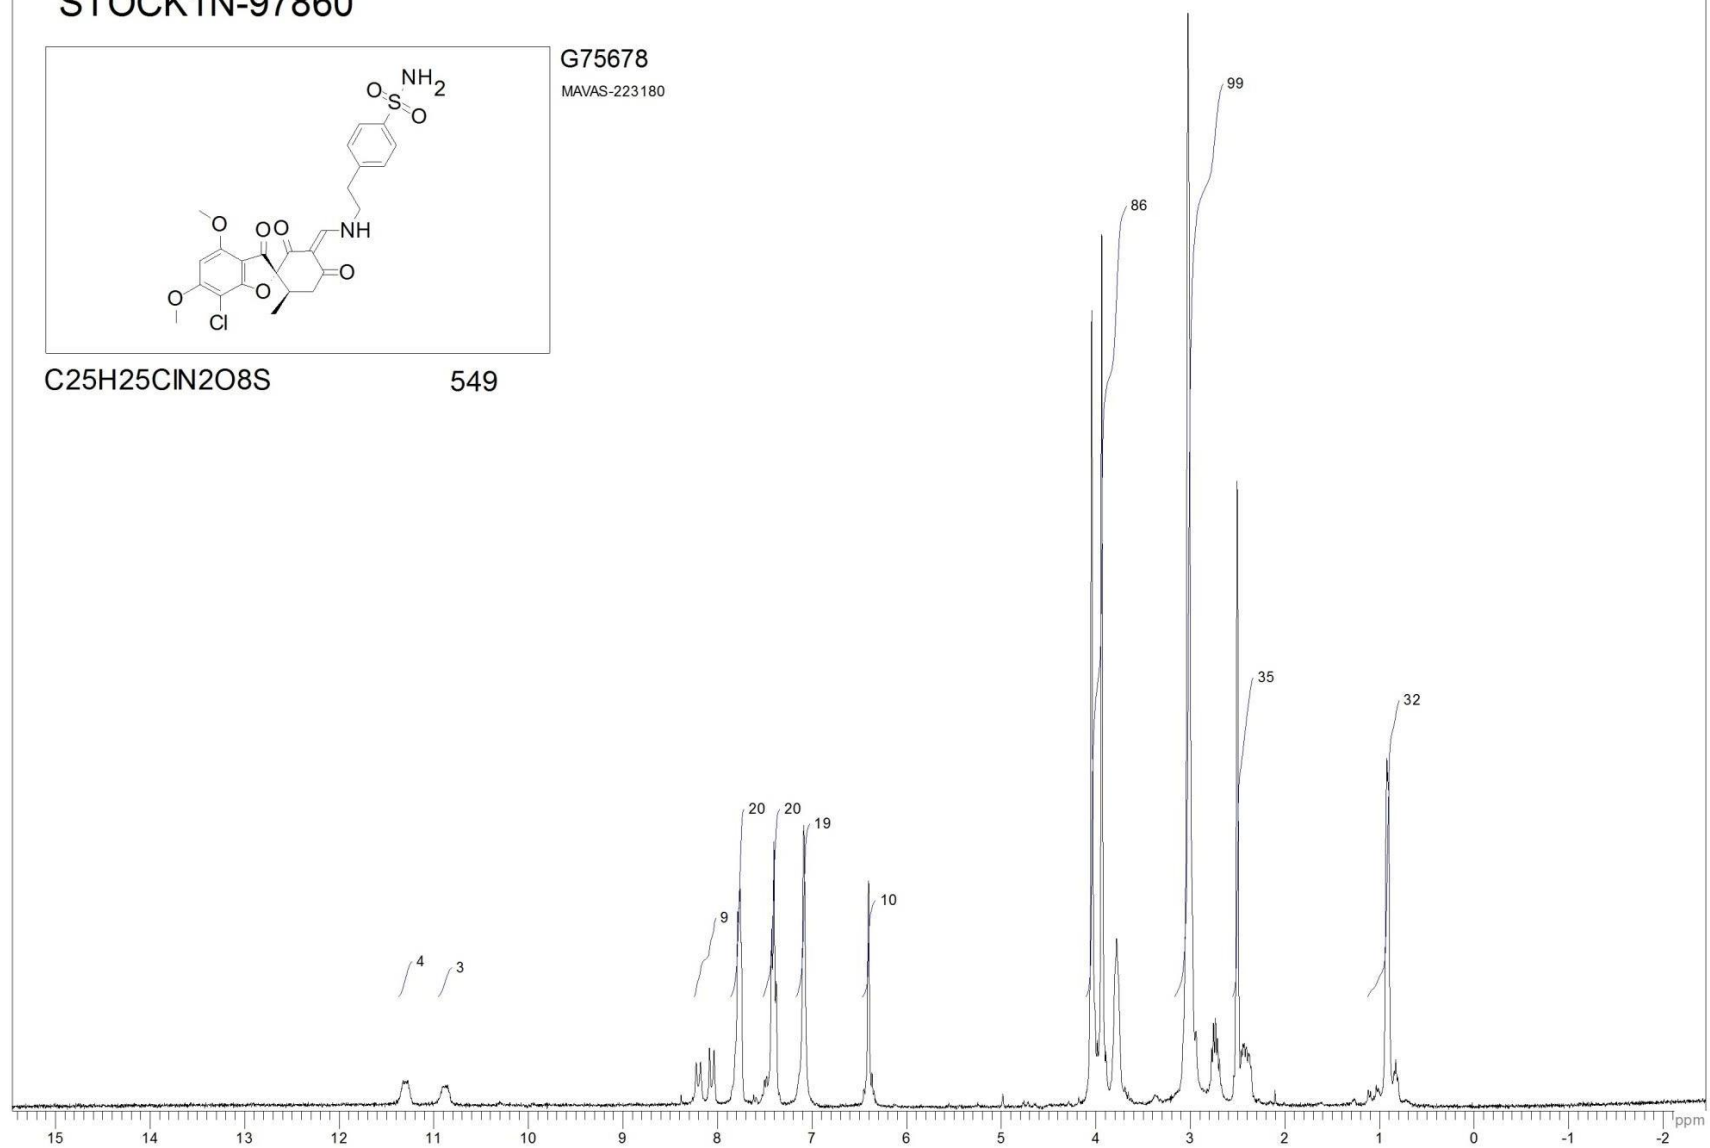

CARBON\_01  
97860

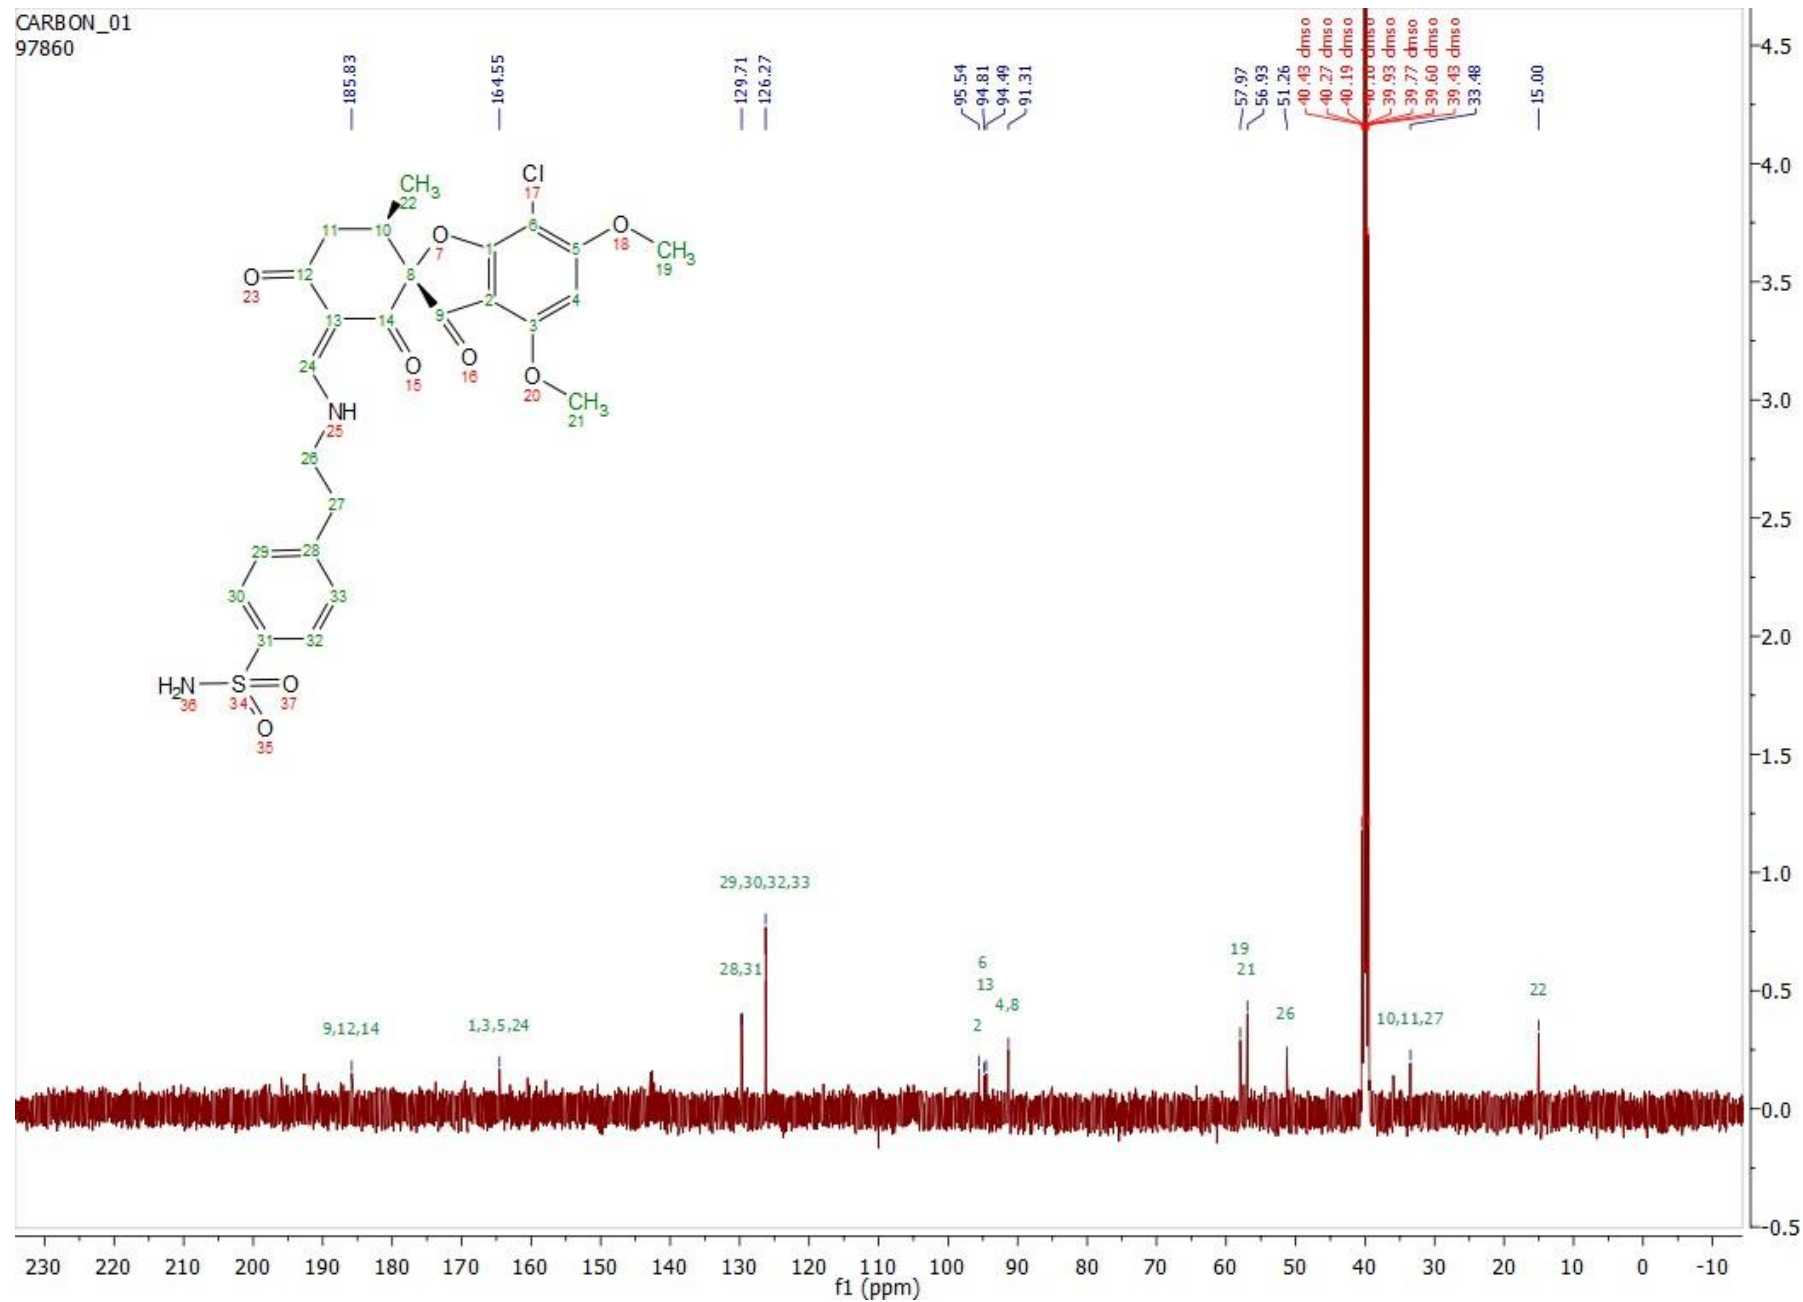

Compound 1g

STOCK1N-97573

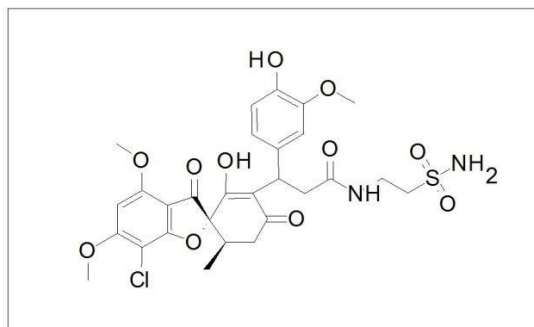

G75808

MAVAS-225952

C<sub>28</sub>H<sub>31</sub>ClN<sub>2</sub>O<sub>11</sub>S

639.08

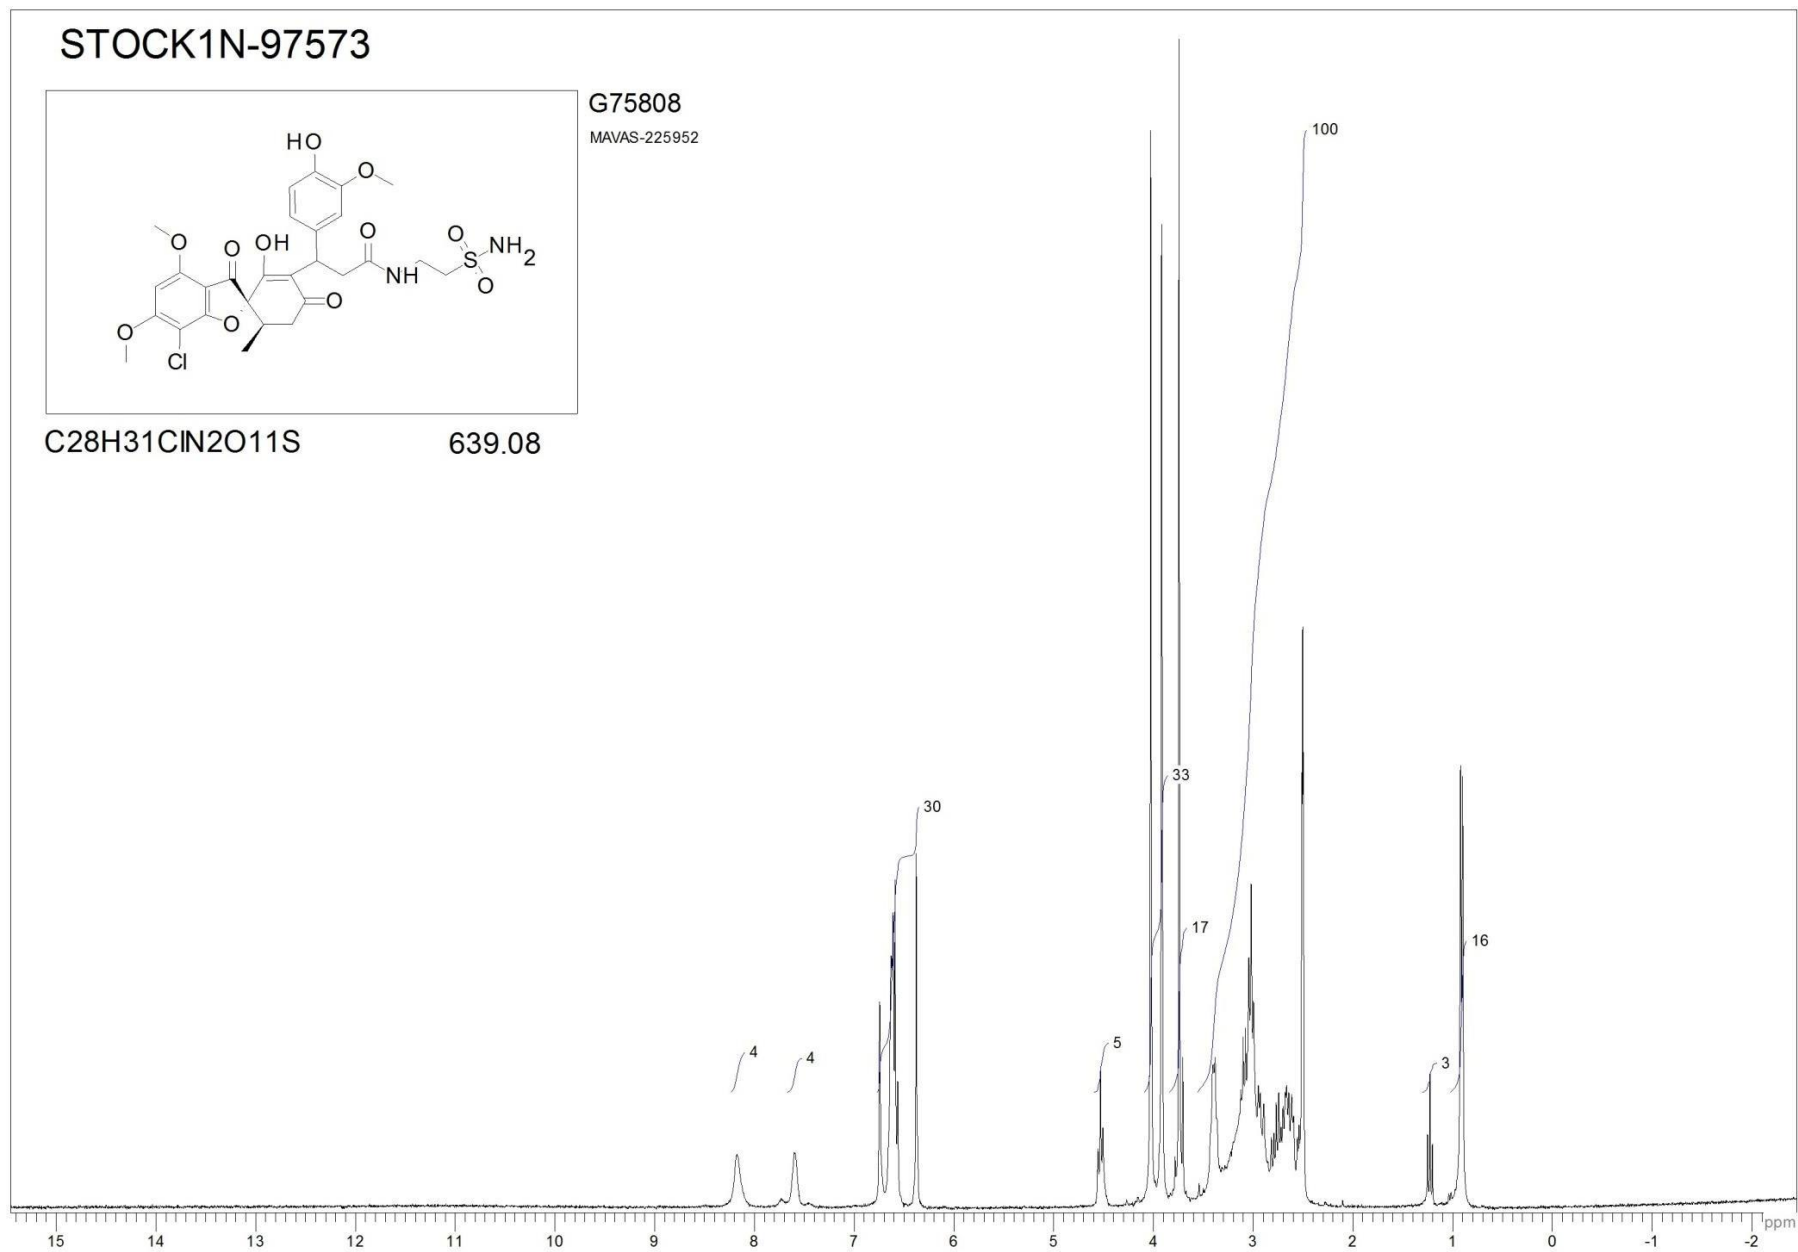

CARBON\_01  
in-97523-16comp

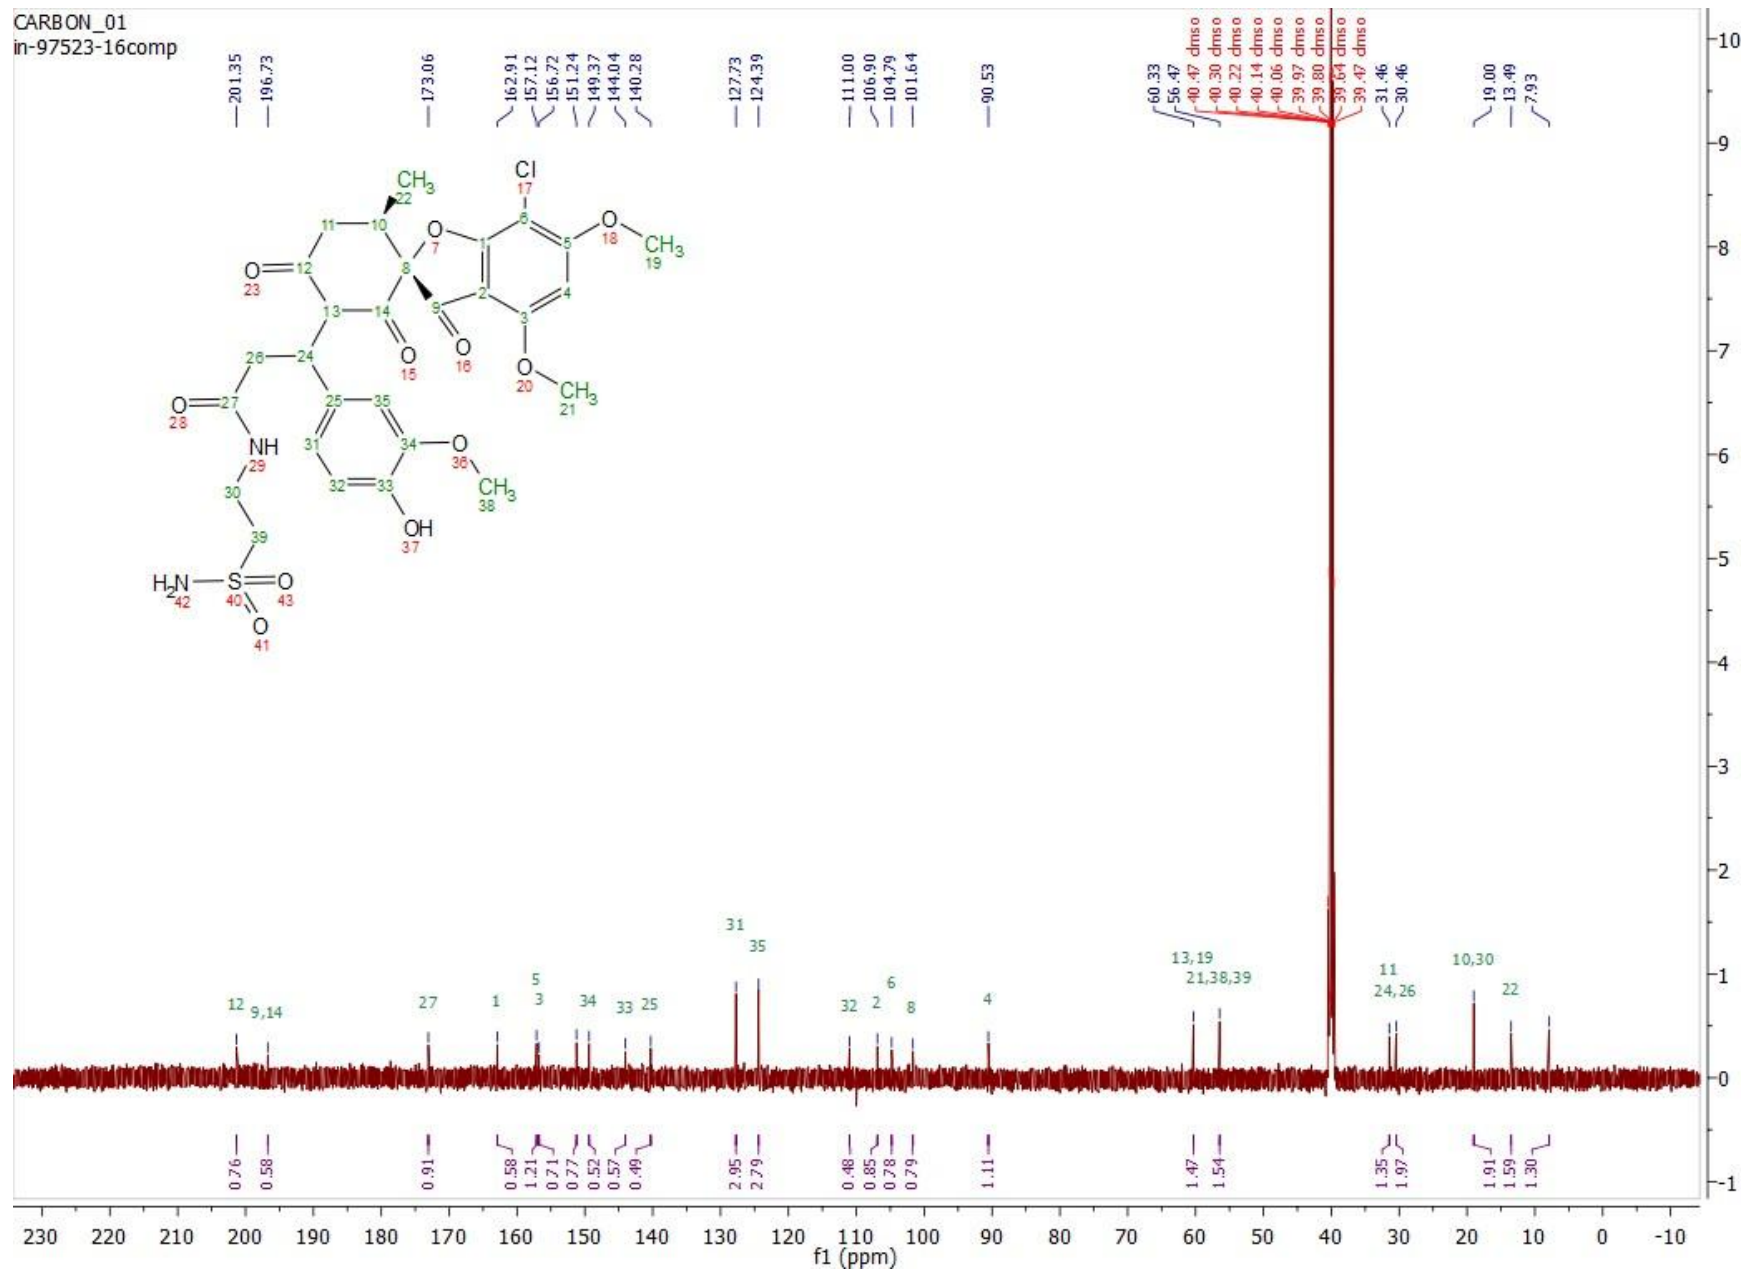

Compound 1h

STOCK1N-98481

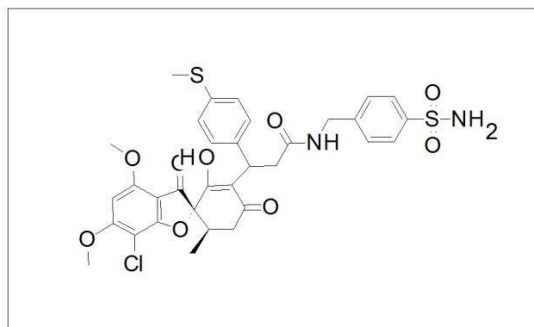

G76409

MAVAS-231718

C<sub>33</sub>H<sub>33</sub>ClN<sub>2</sub>O<sub>9</sub>S<sub>2</sub>

701.22

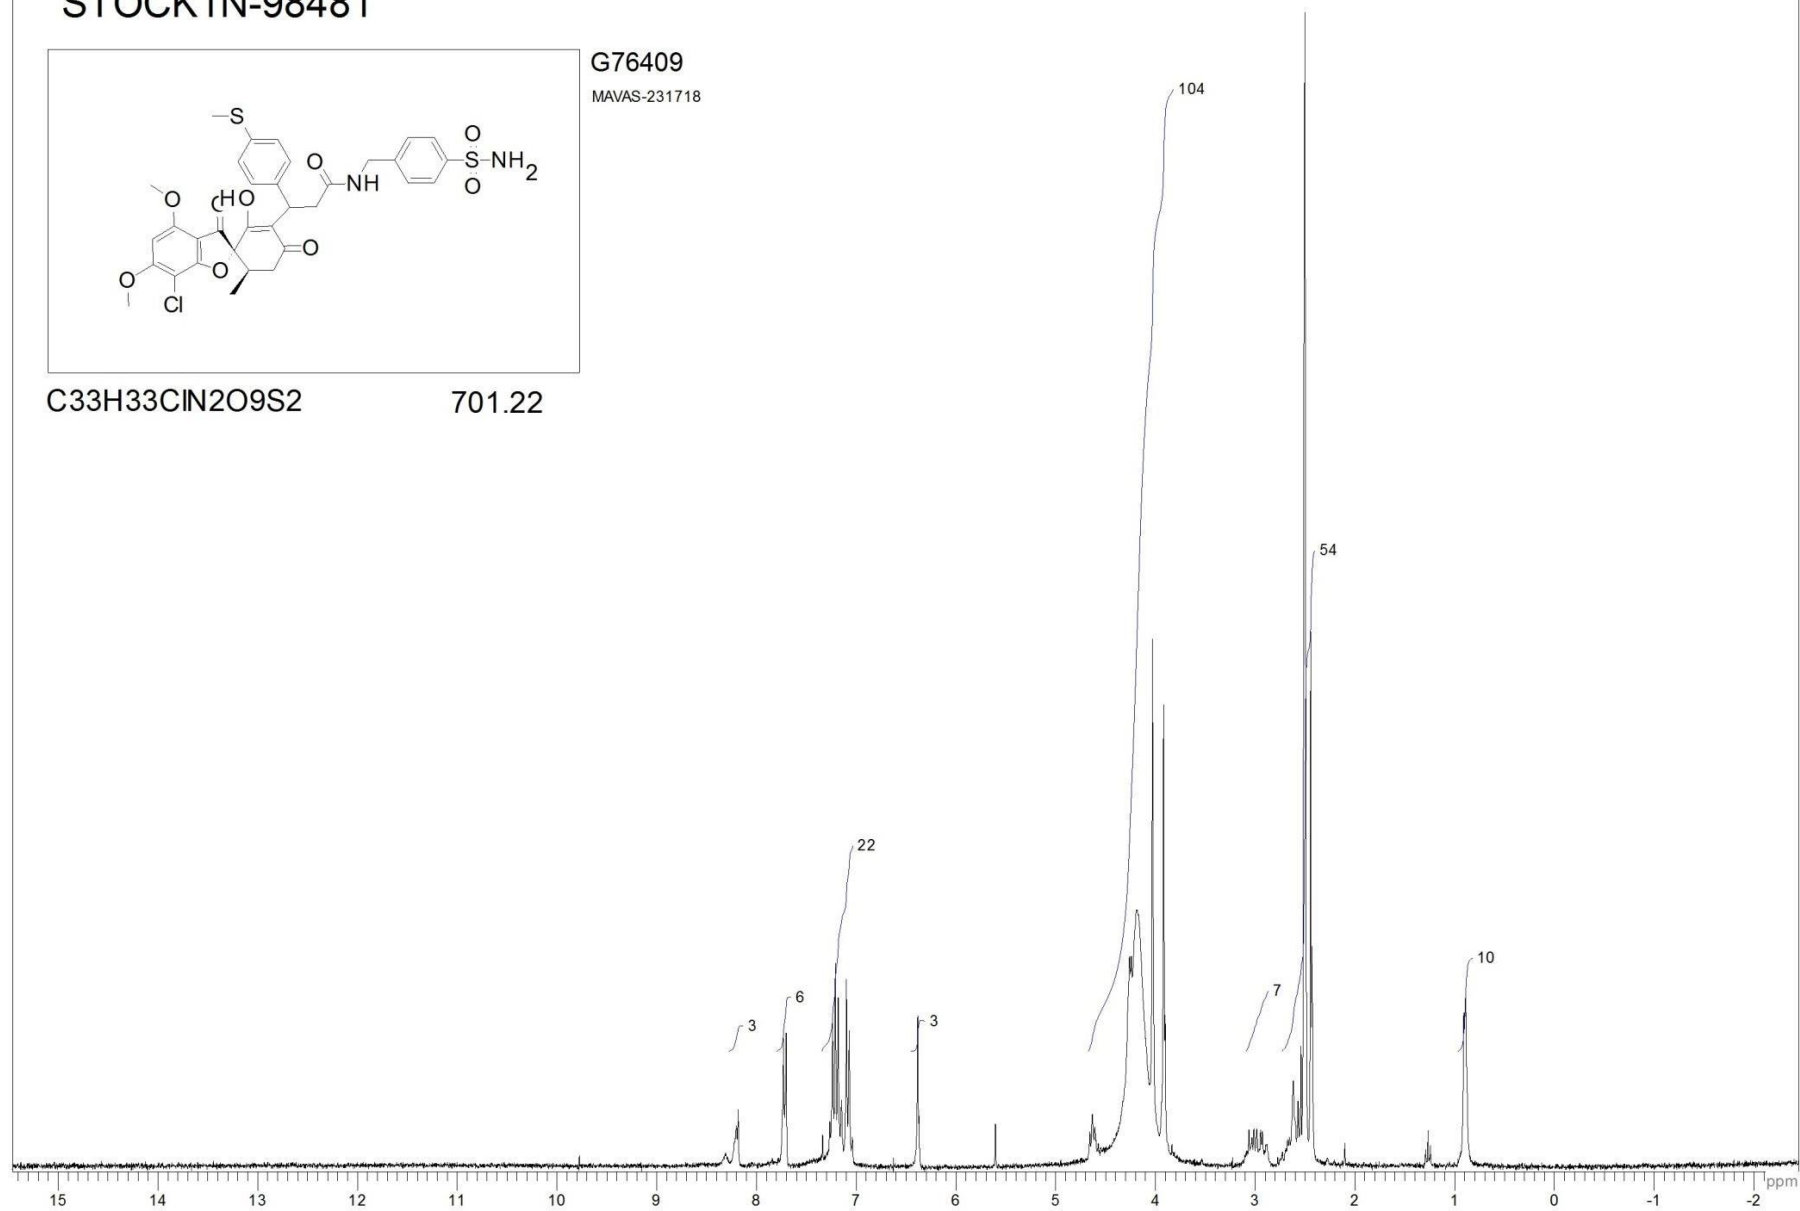

CARBON\_01  
1n-98481-16comp

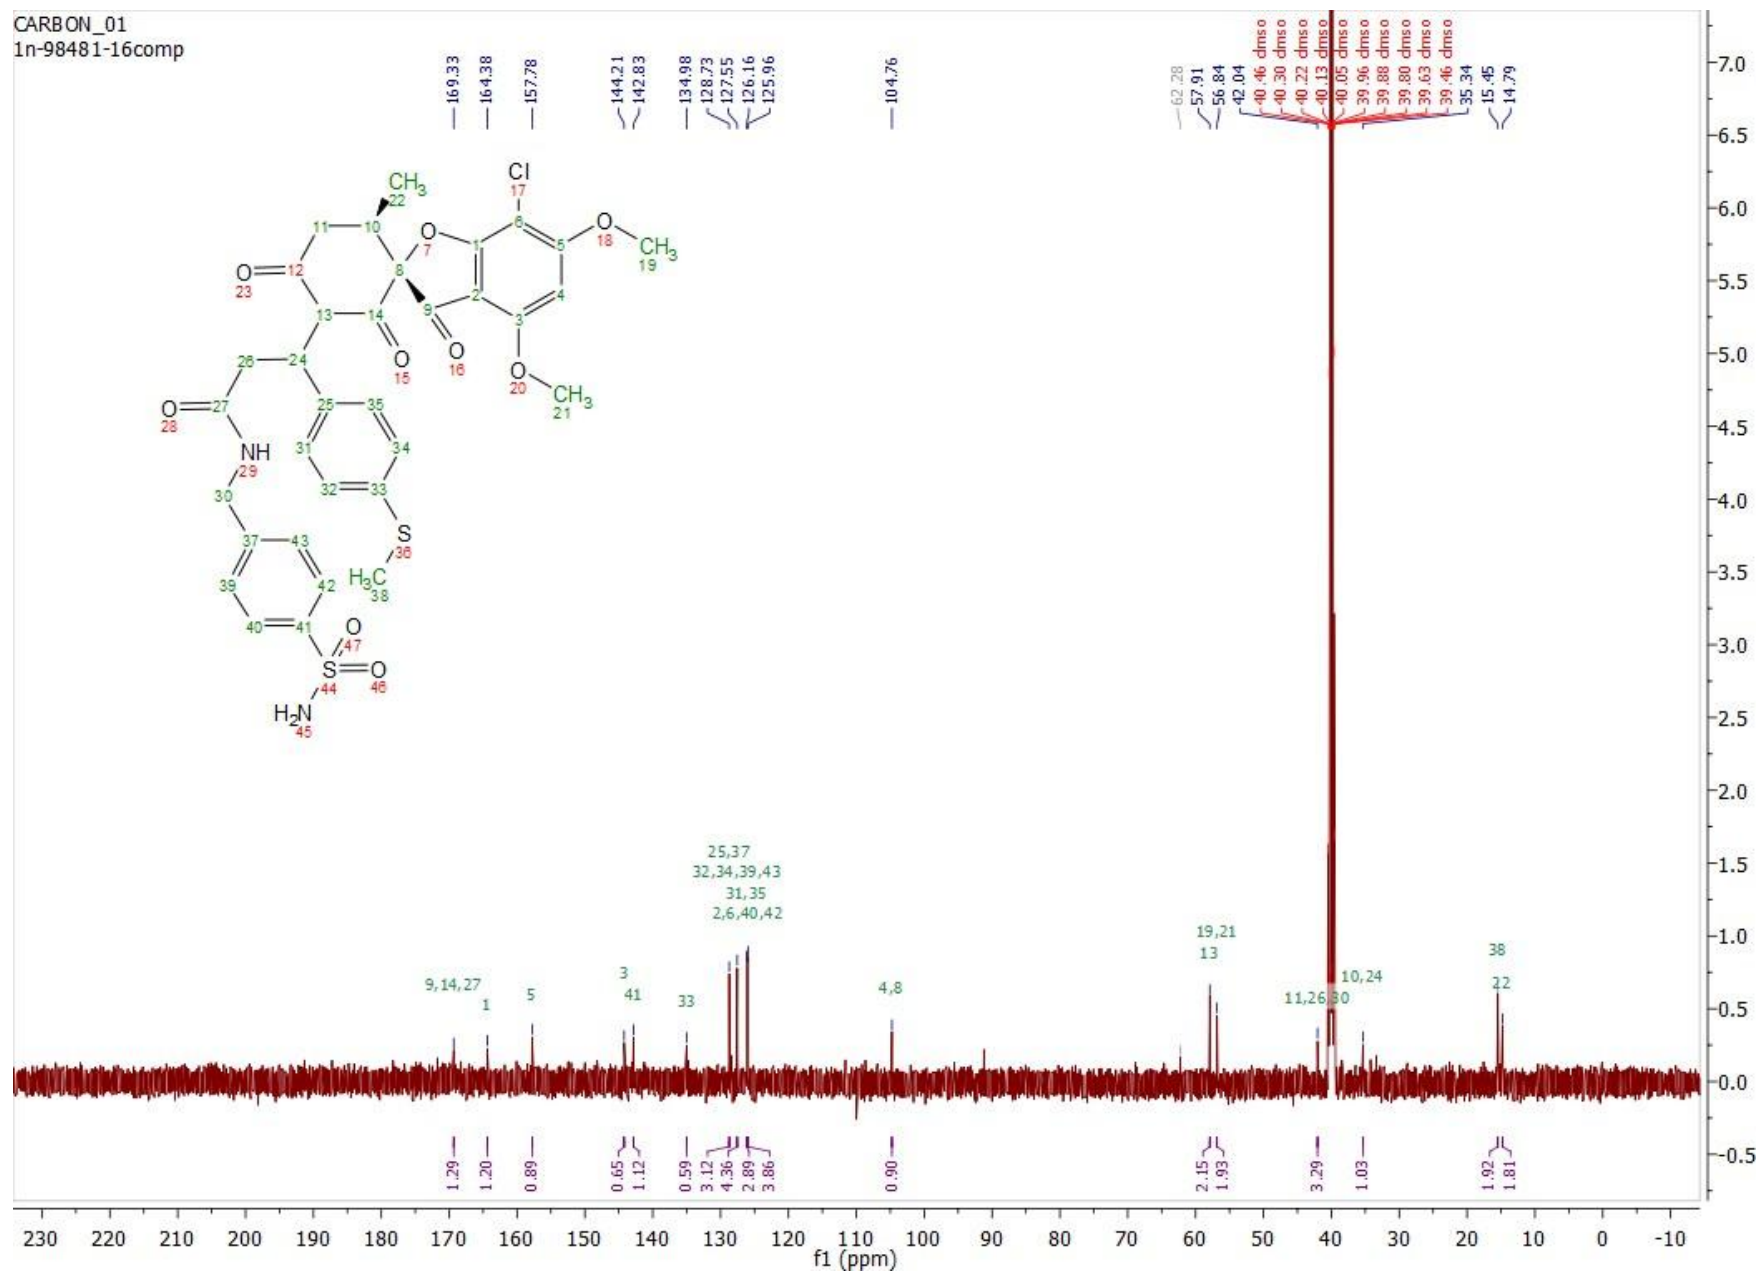

Compound 1i

STOCK1N-97977

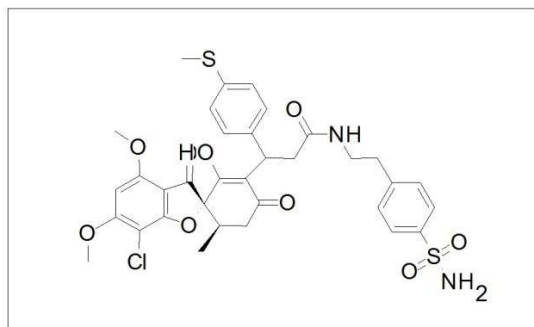

G76407

MAVAS-231715

C<sub>34</sub>H<sub>35</sub>ClN<sub>2</sub>O<sub>9</sub>S<sub>2</sub>

715.24

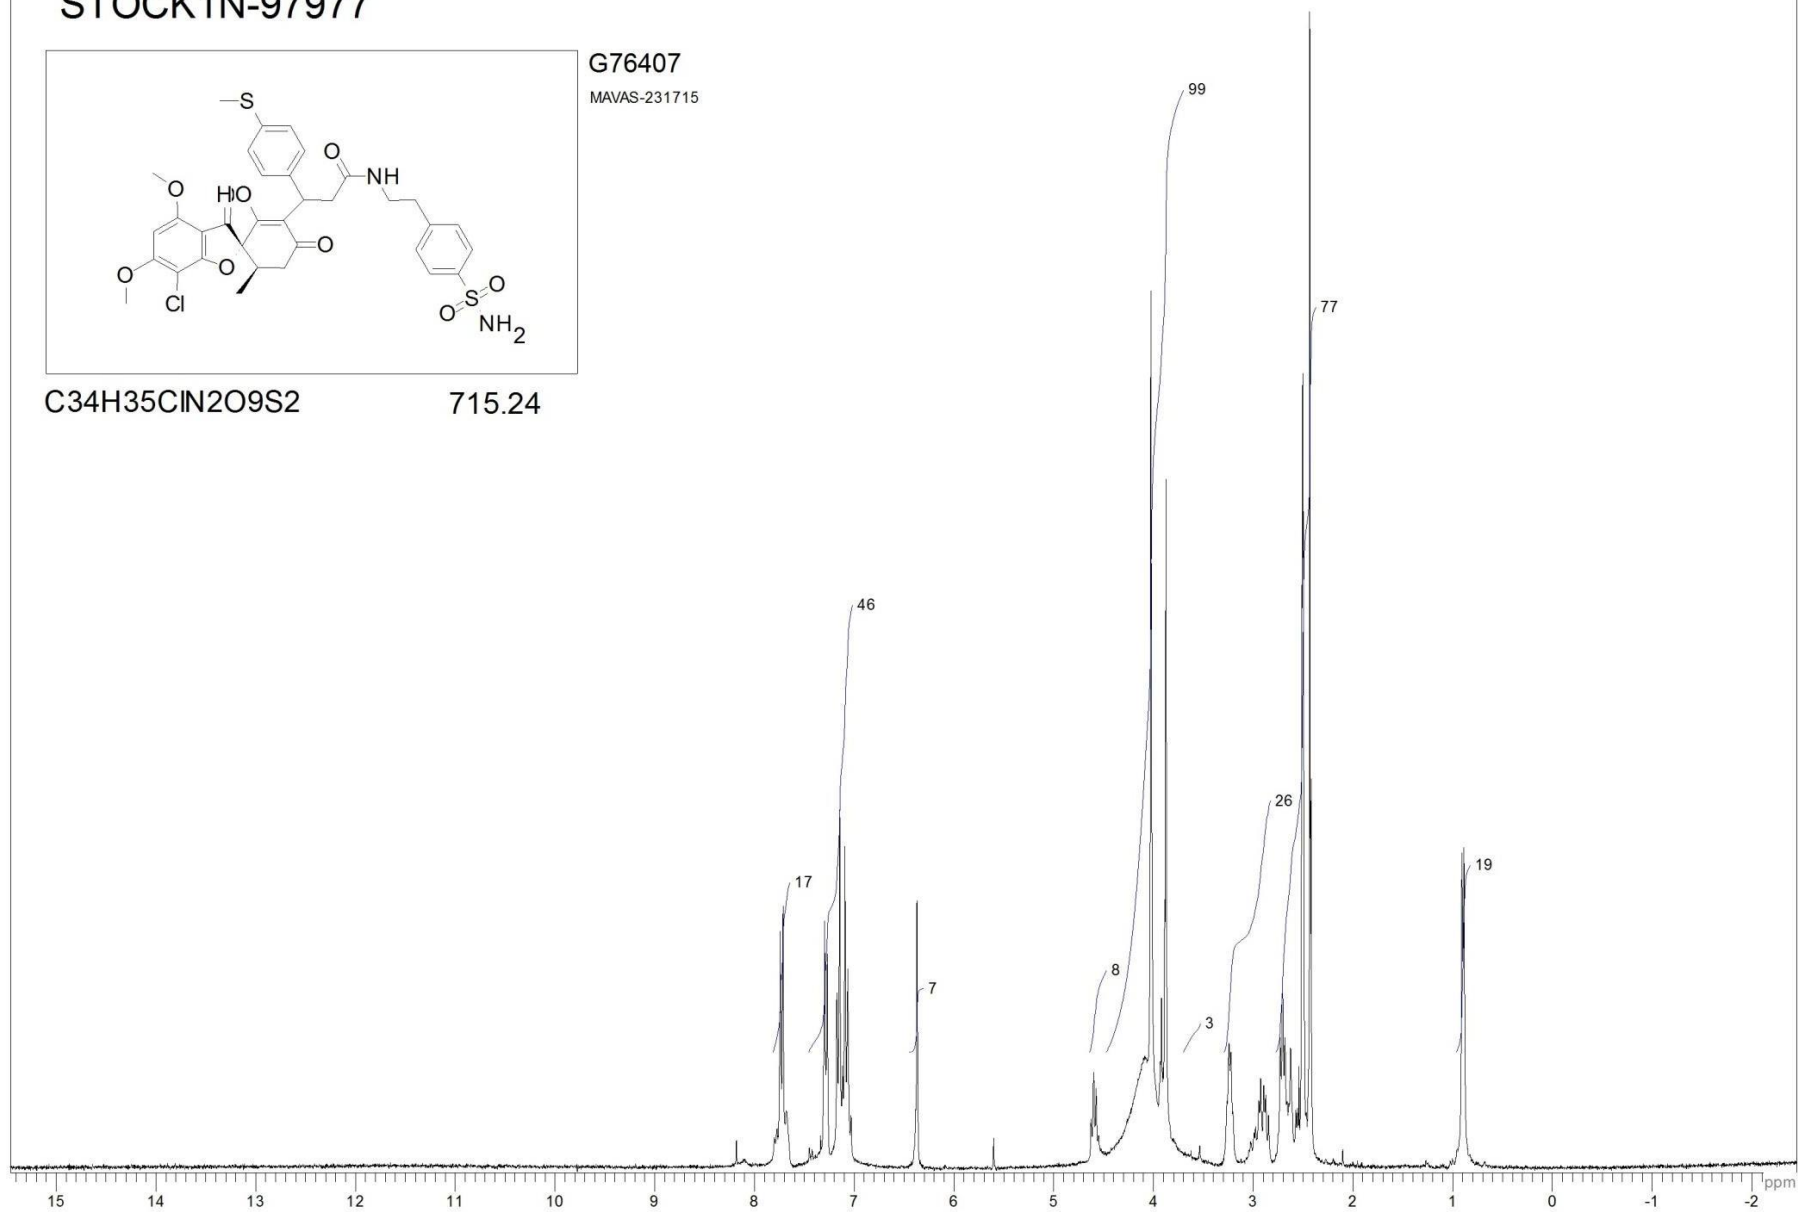

CARBON\_01  
97977

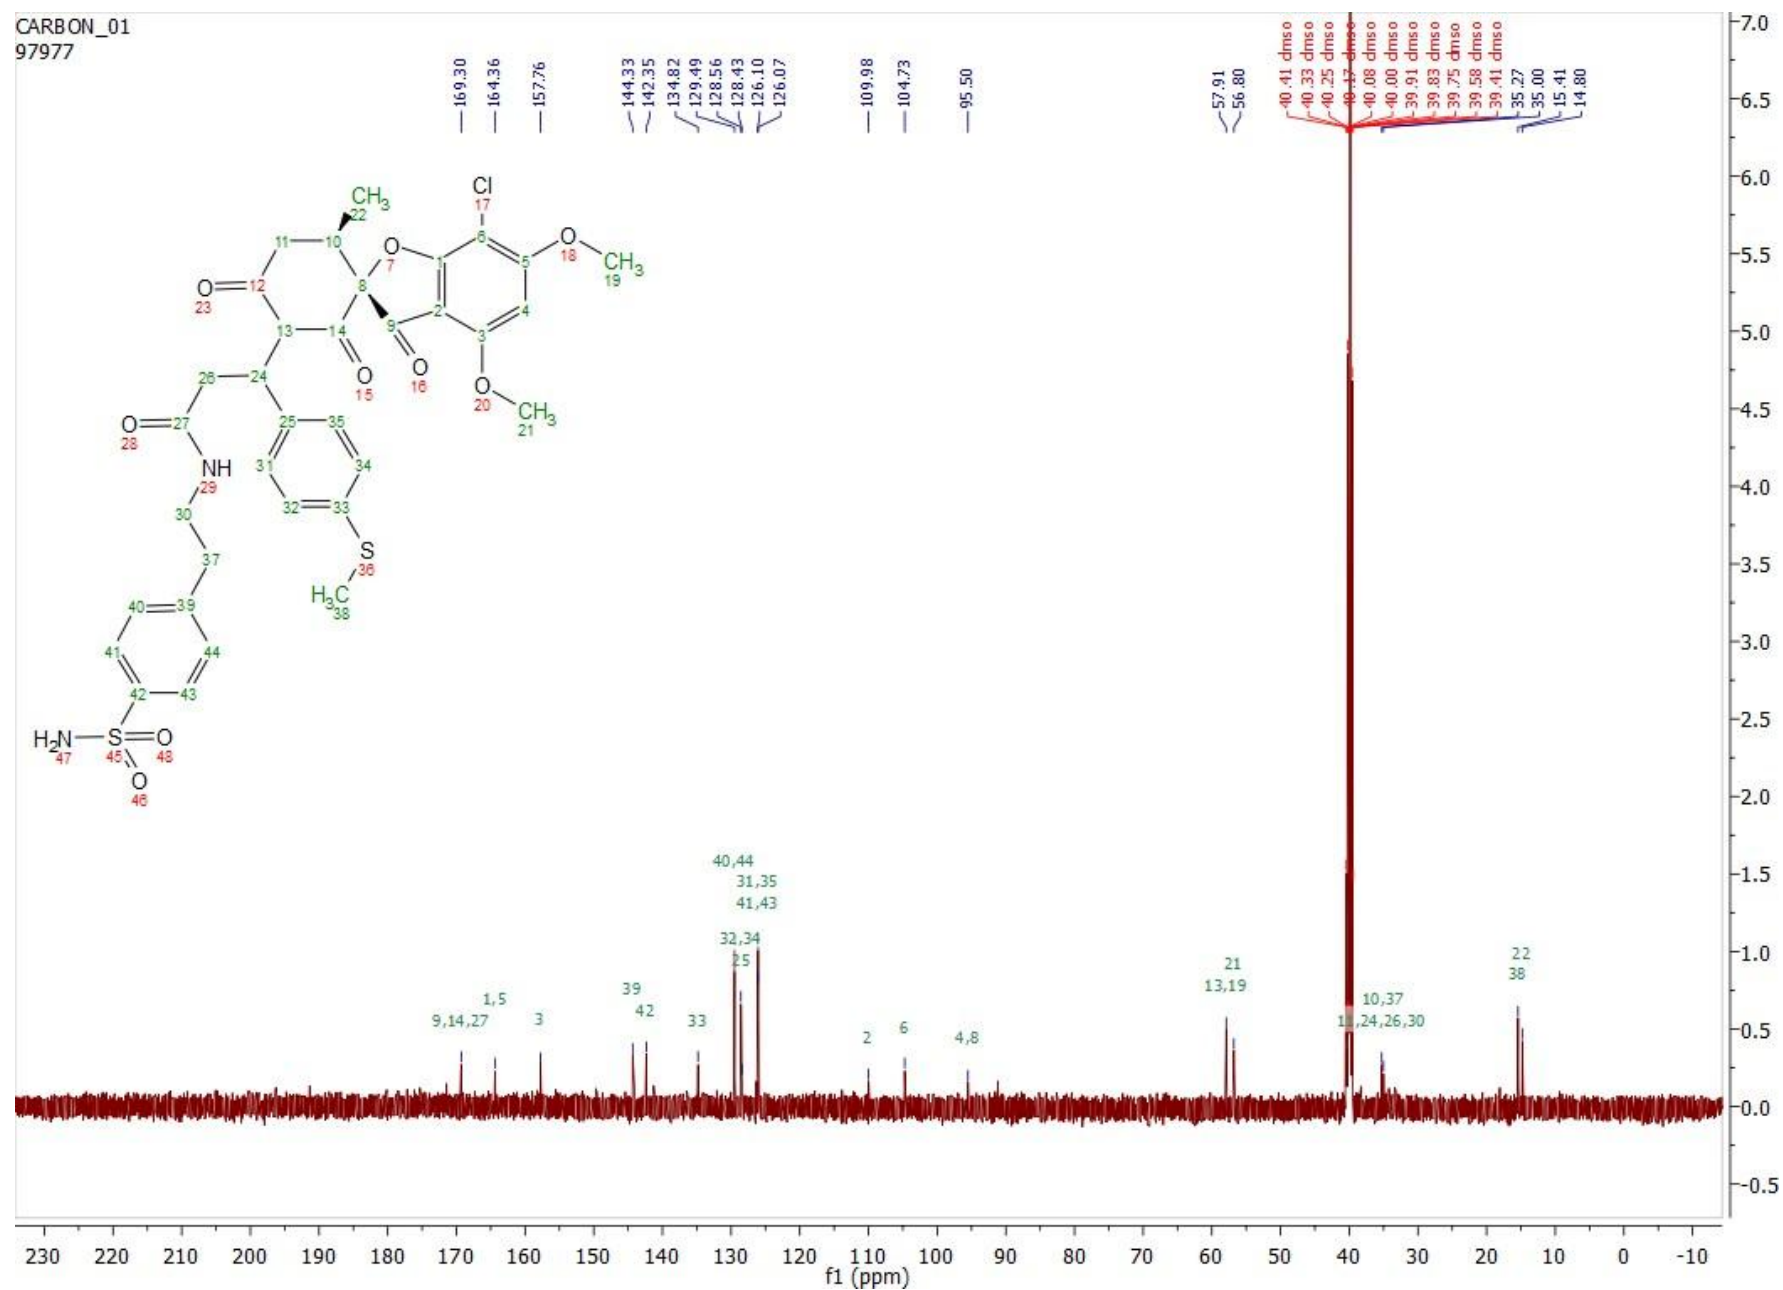

Compound 1j

STOCK1N-98588

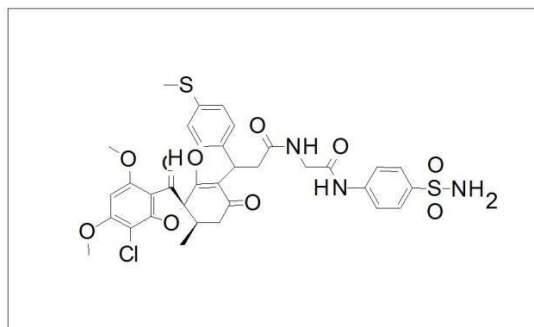

G76425

MAVAS-232046

C<sub>34</sub>H<sub>34</sub>ClN<sub>3</sub>O<sub>10</sub>S<sub>2</sub>

744.24

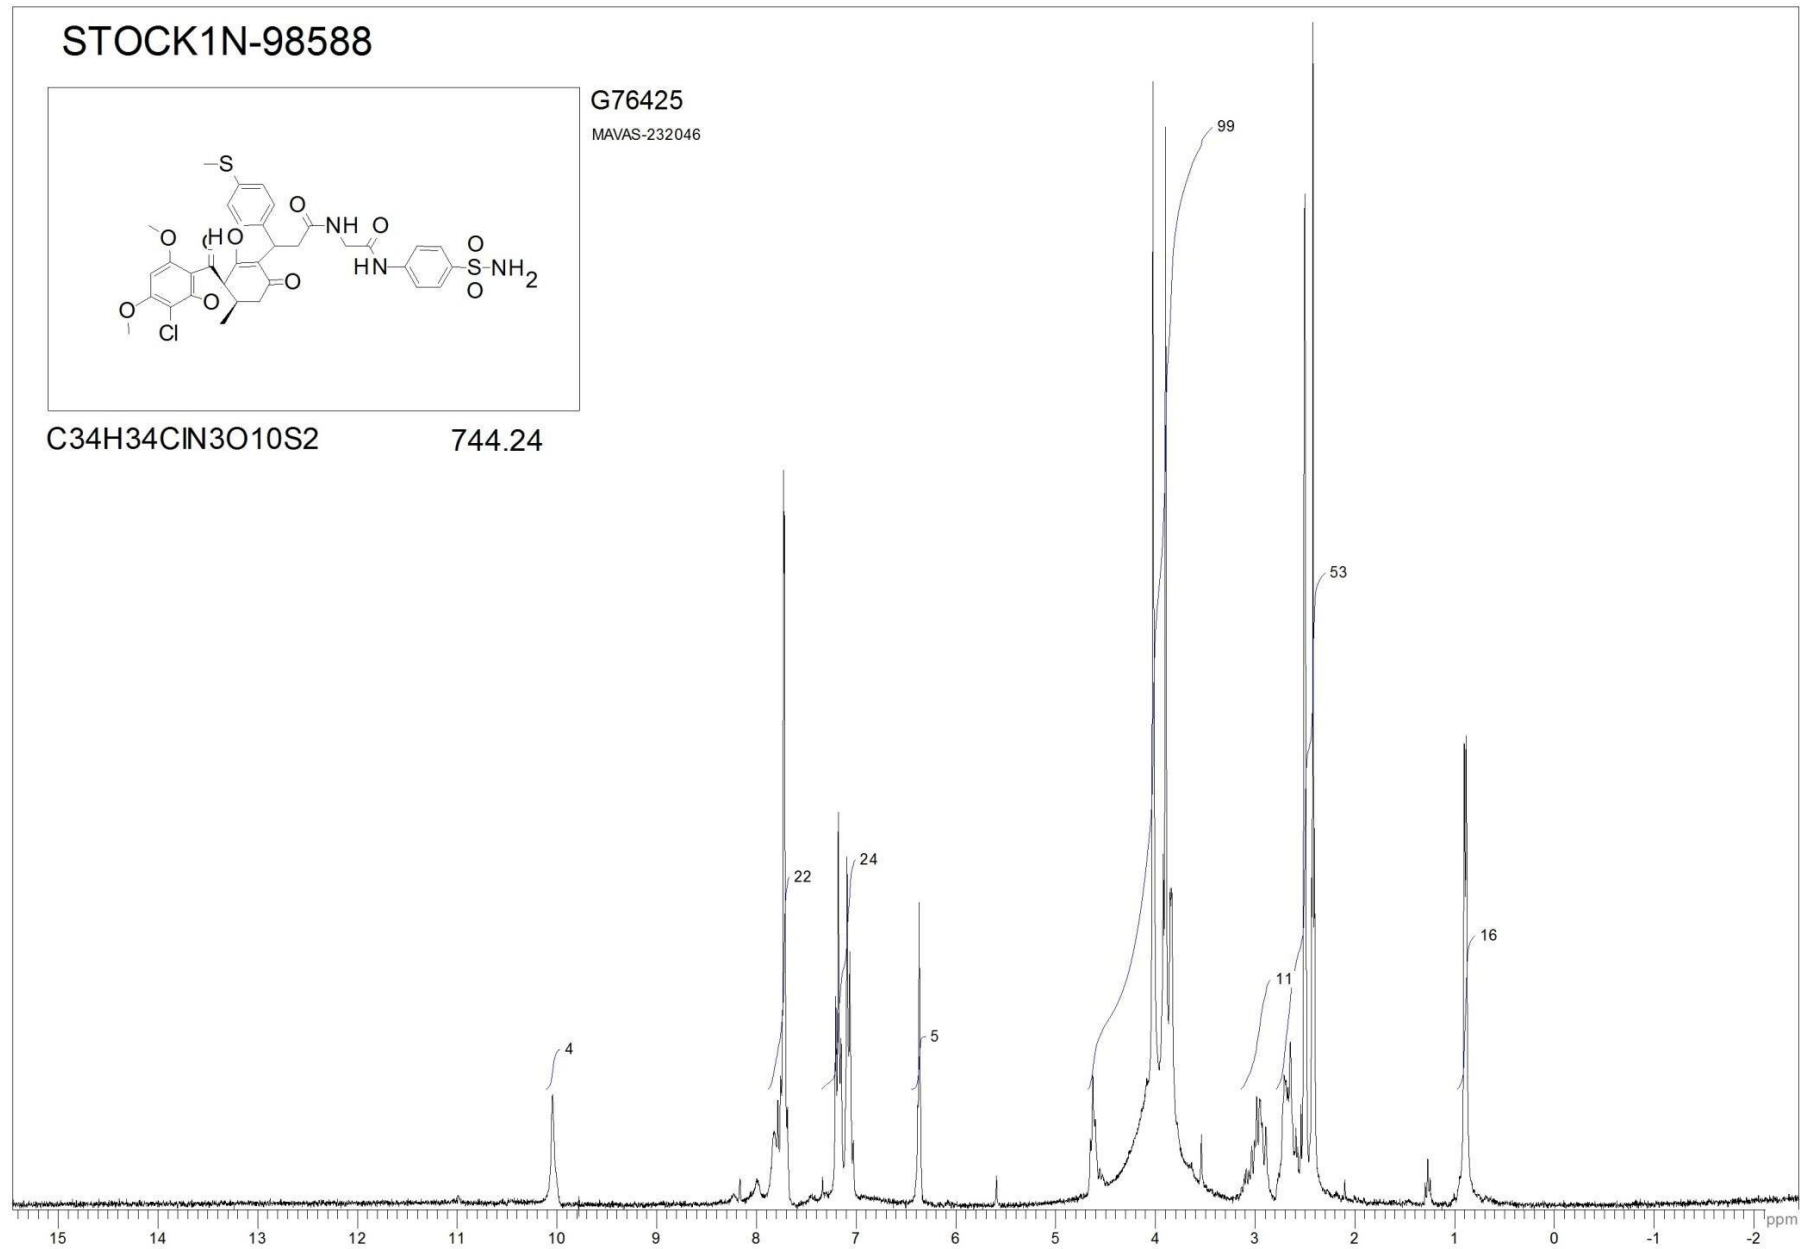

CARBON\_01  
98588\_16comp

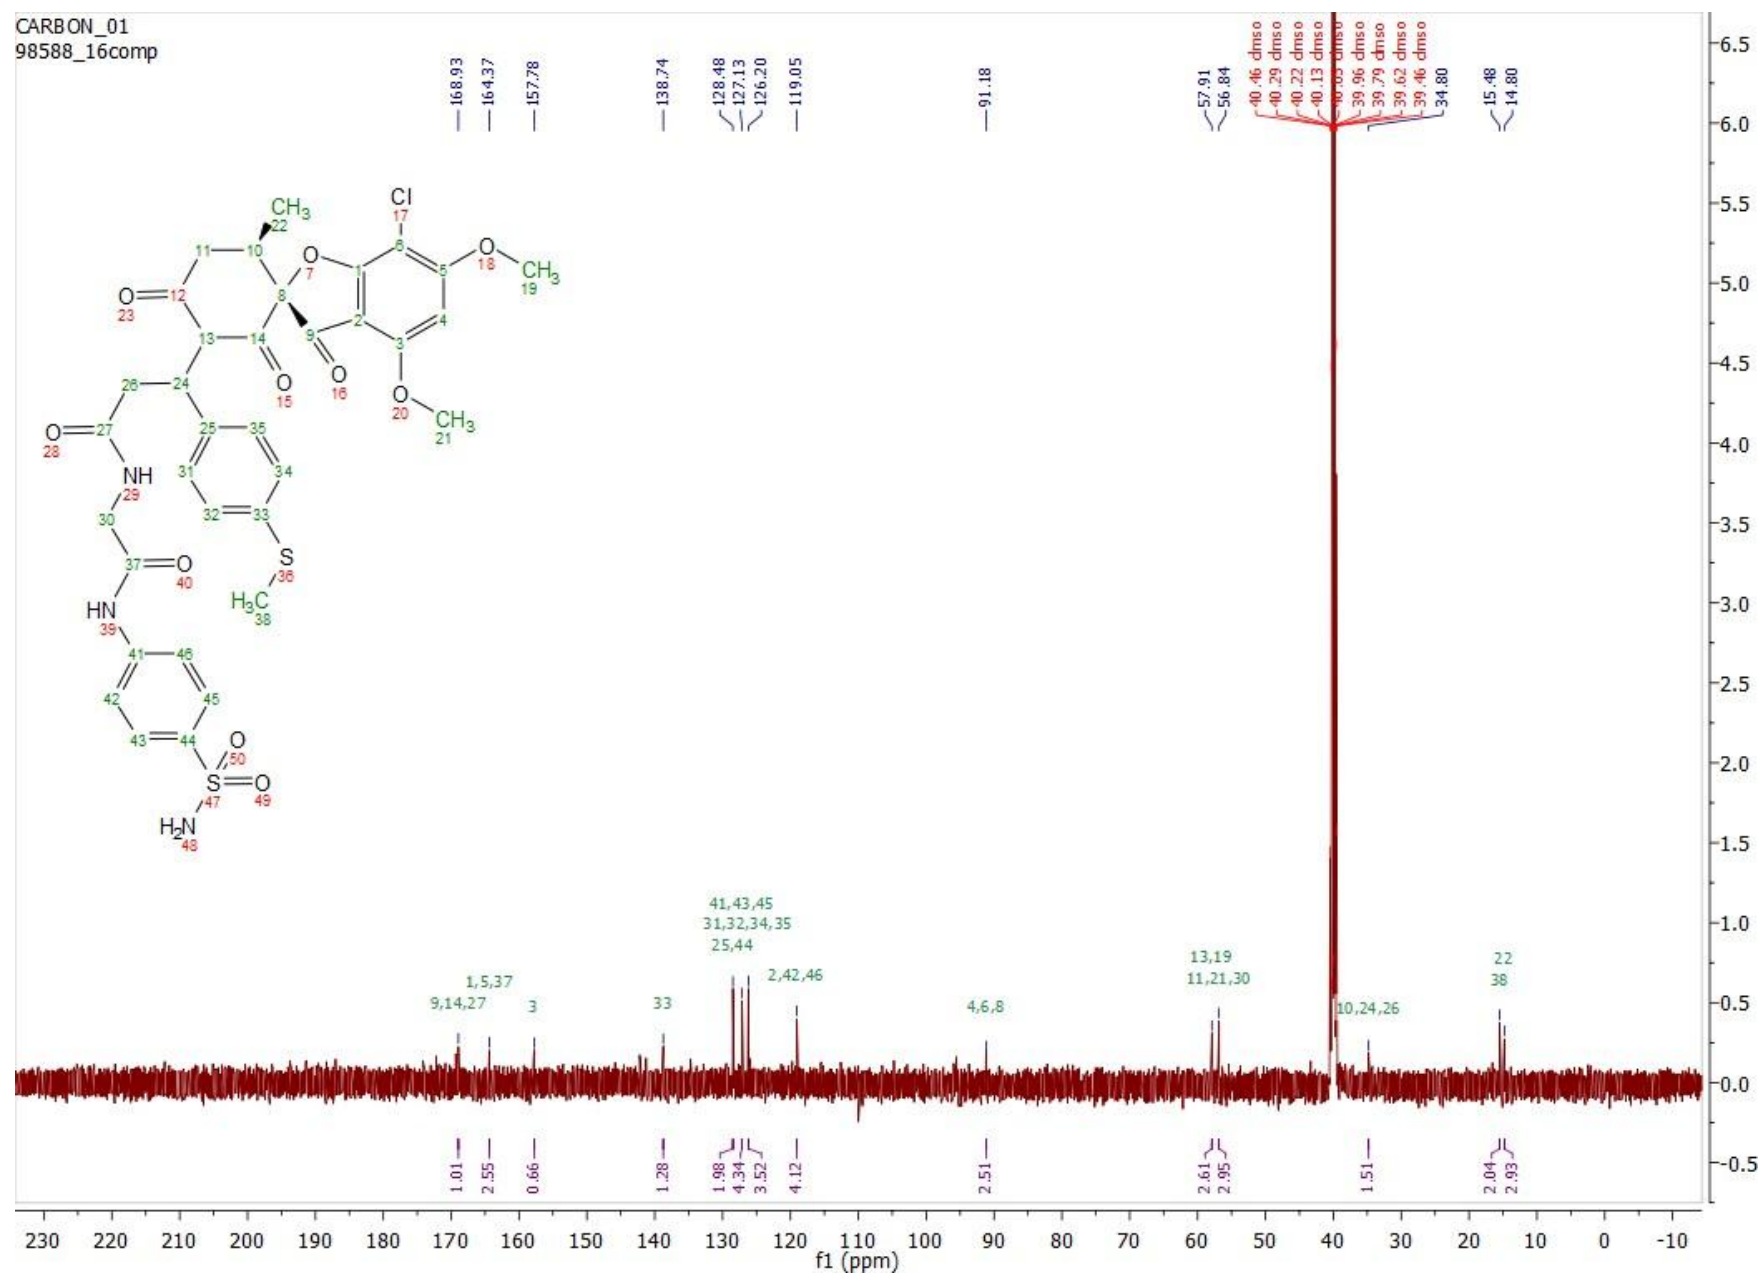

Compound 4a

STOCK1N-97280

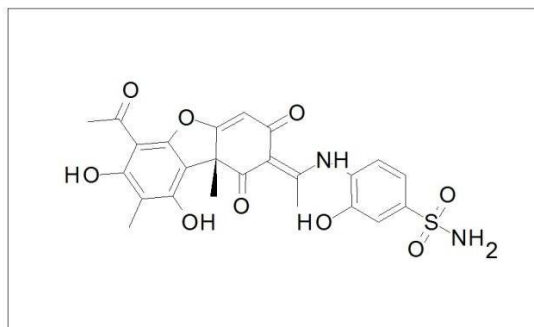

G74751  
MAVAS-216587

C<sub>24</sub>H<sub>22</sub>N<sub>2</sub>O<sub>9</sub>S

514.51

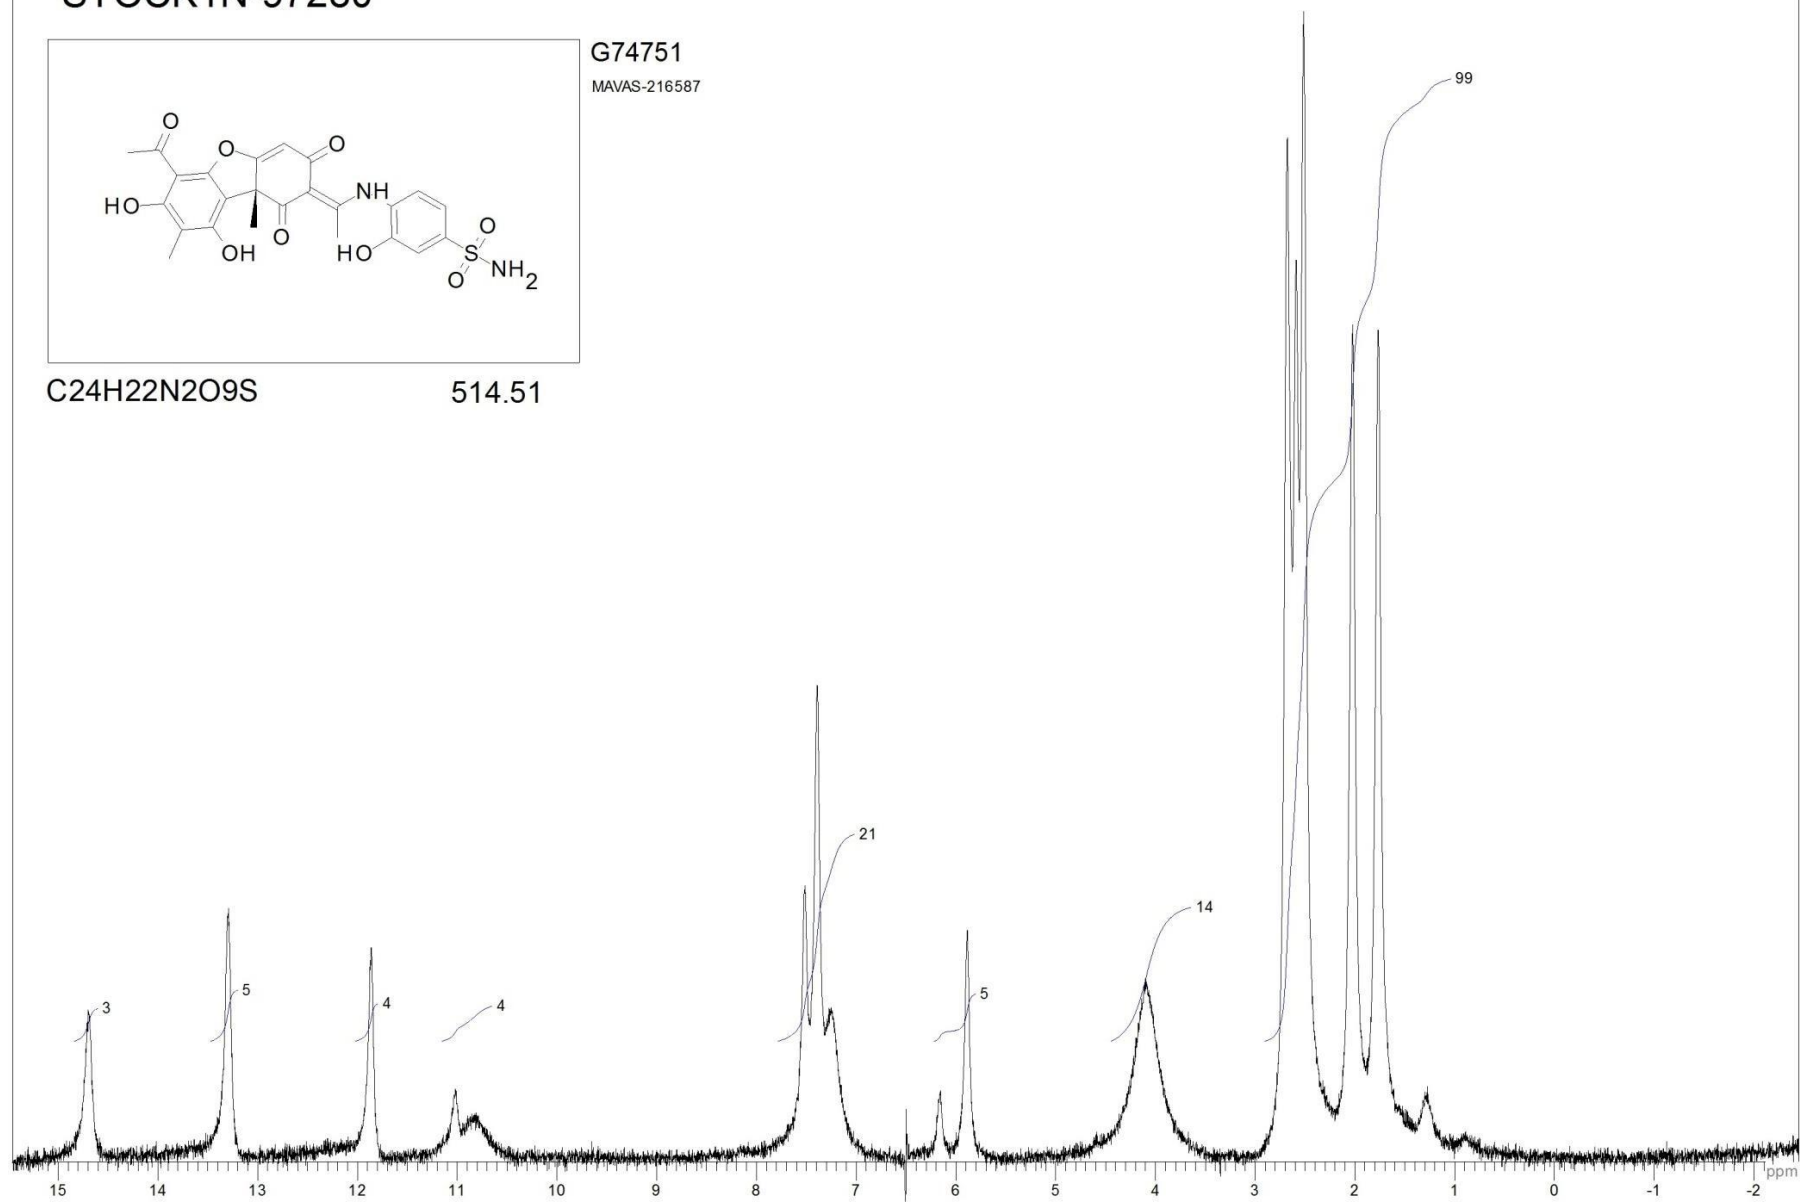

CARBON\_01  
IN-97280

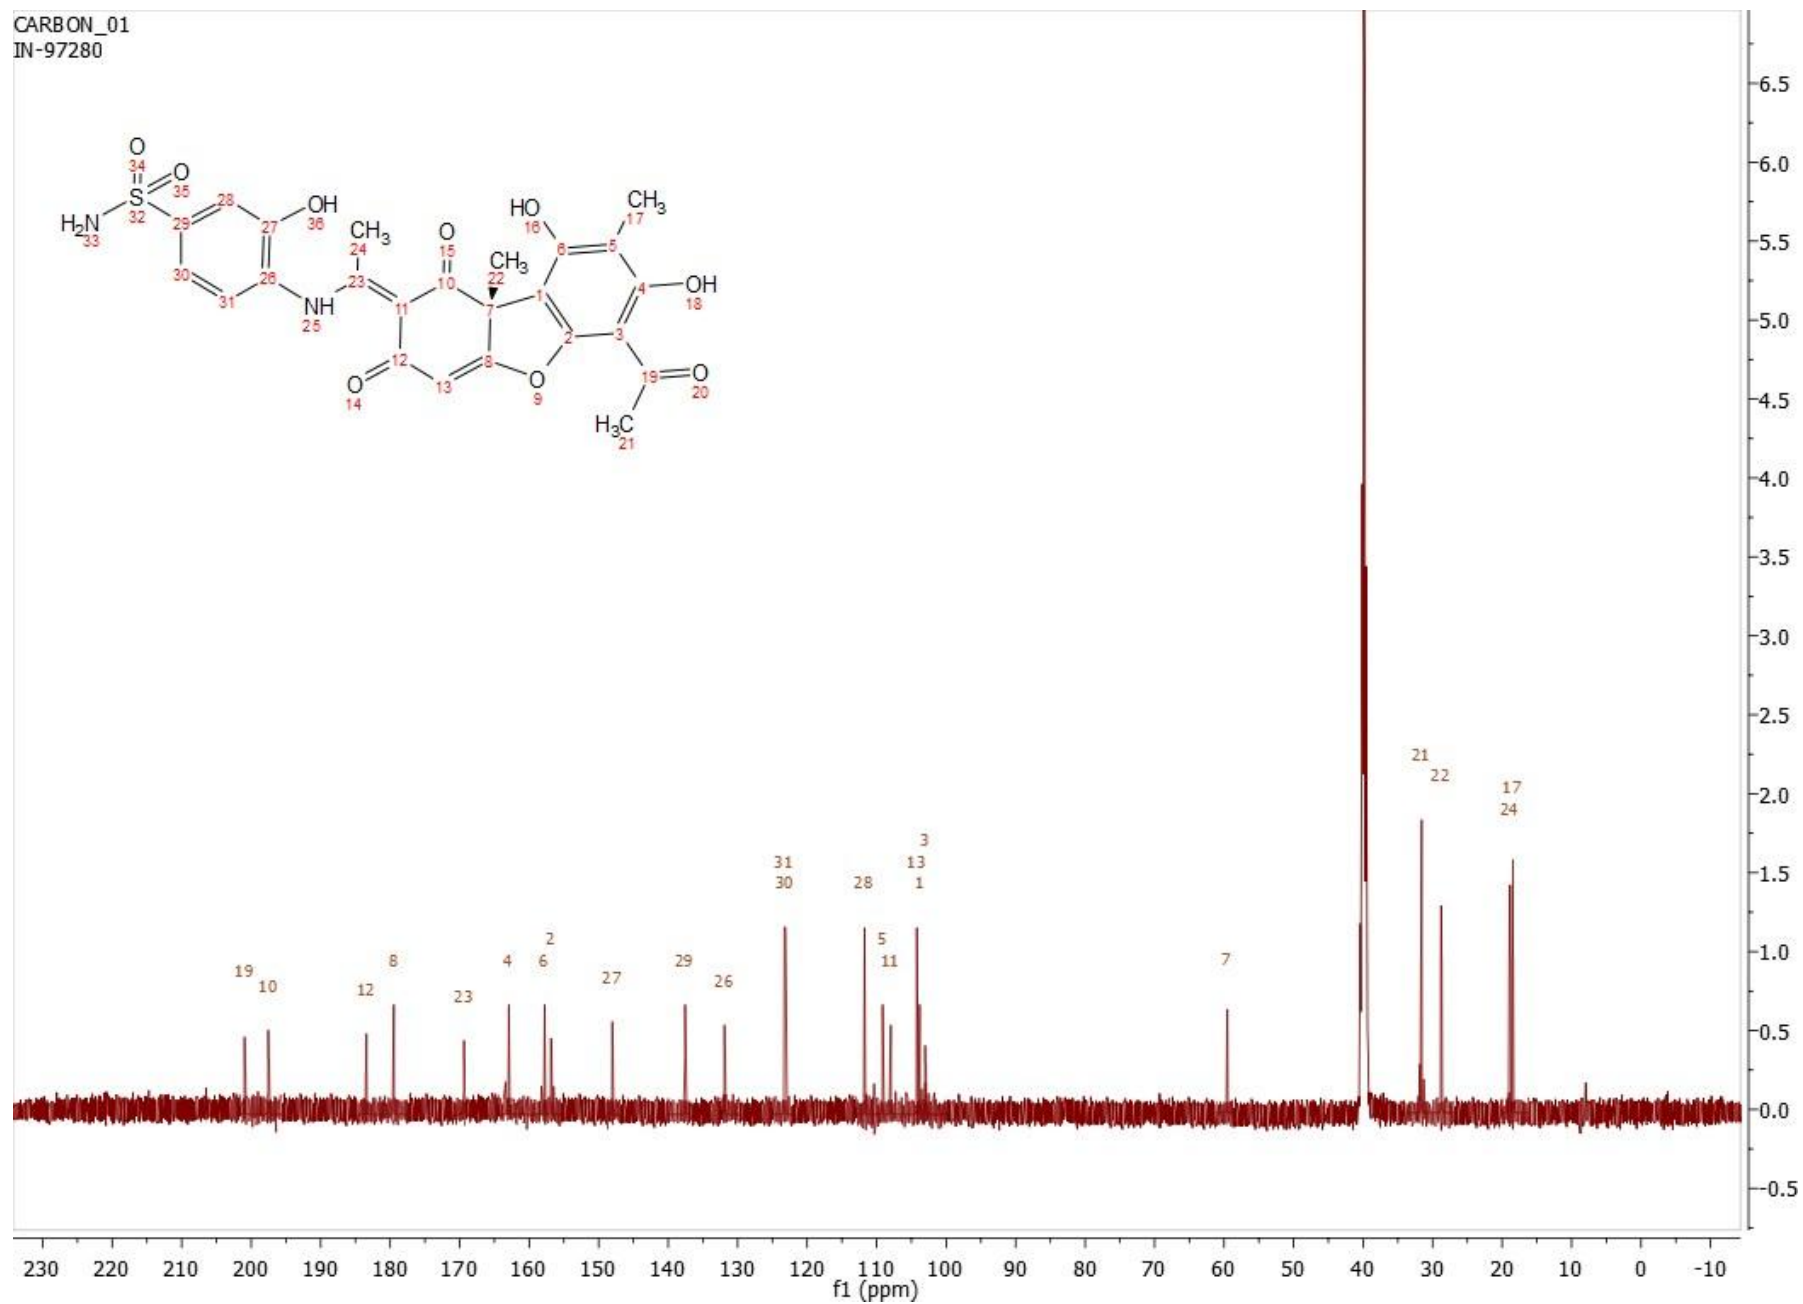

Compound 4b

STOCK1N-97934

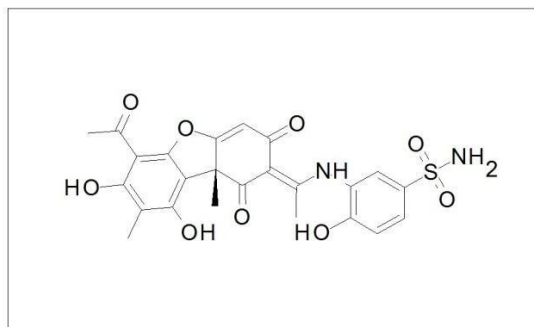

G74752  
MAVAS-216588

C24H22N2O9S

514.51

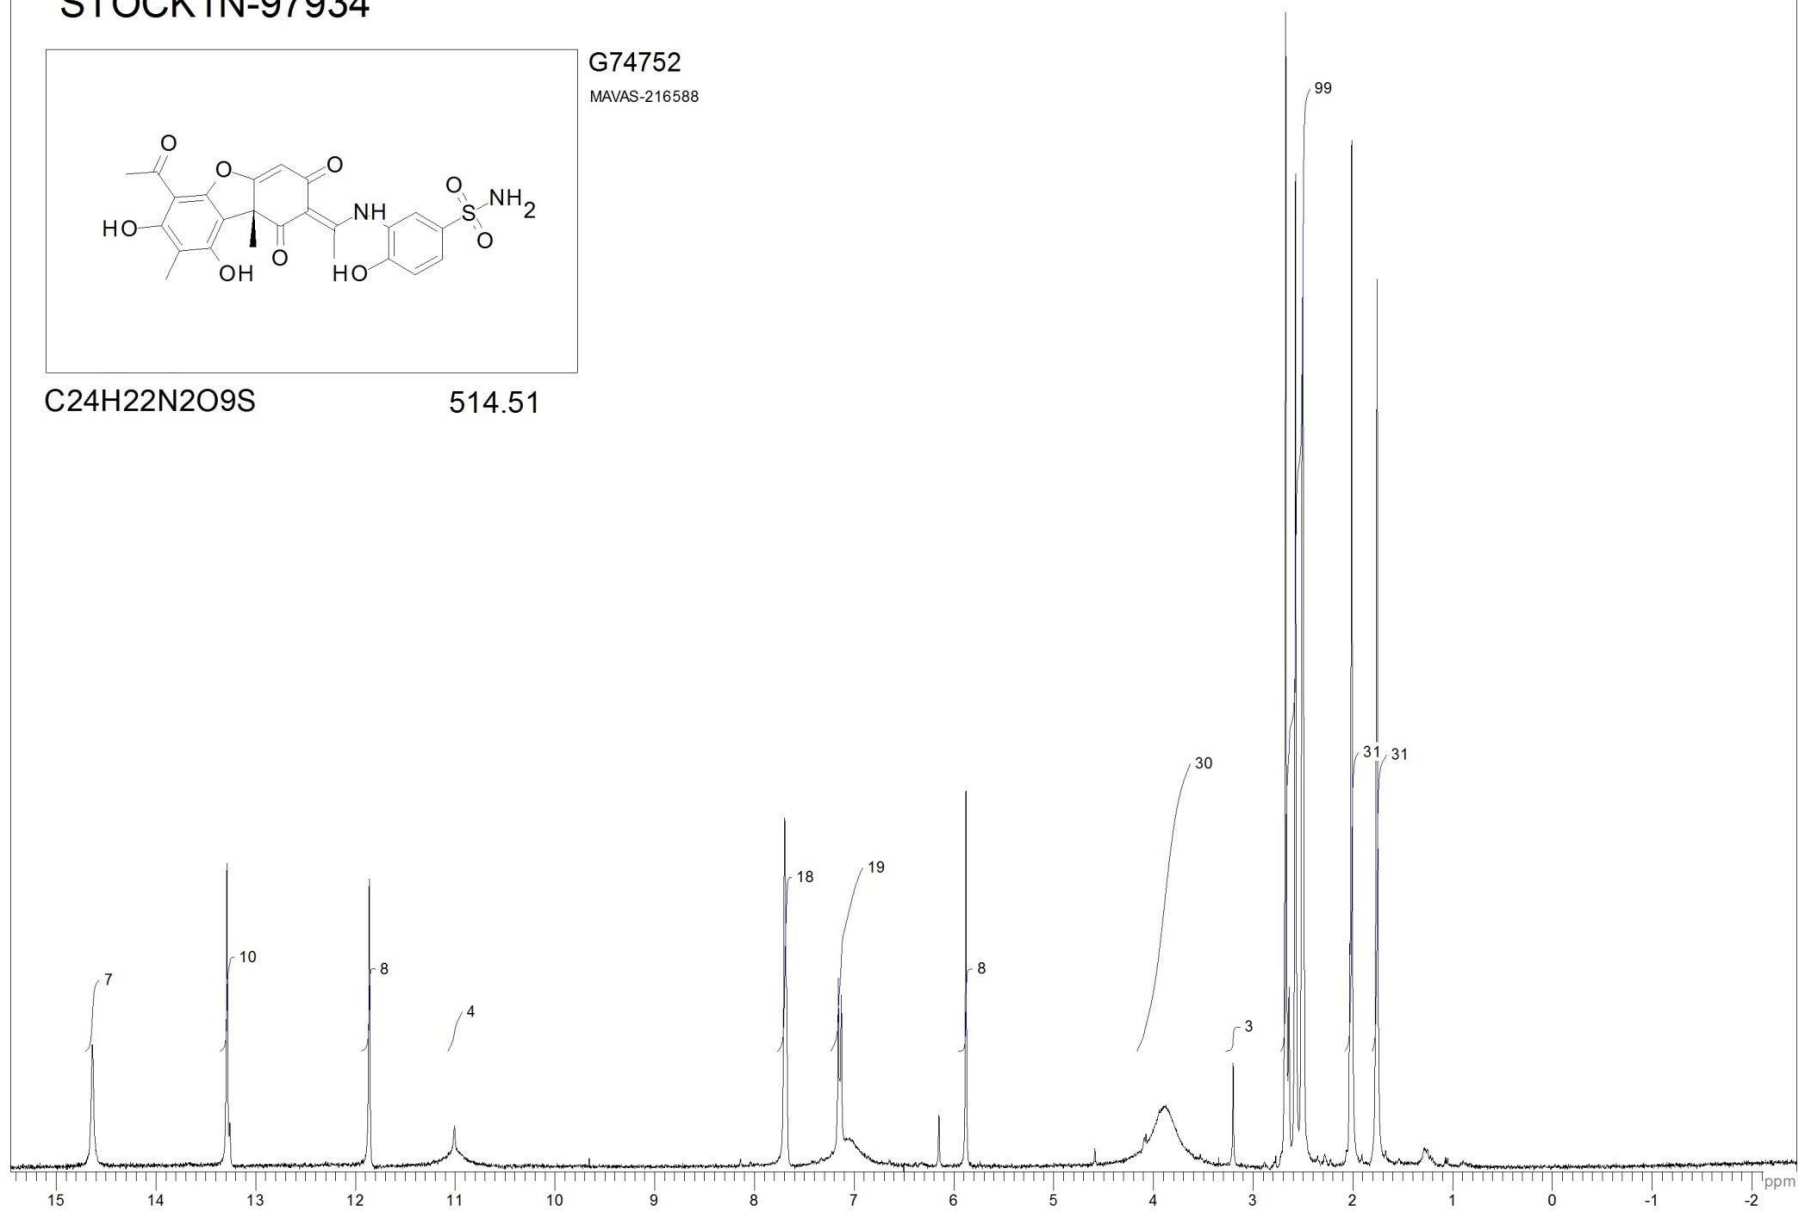

CARBON\_01

97934

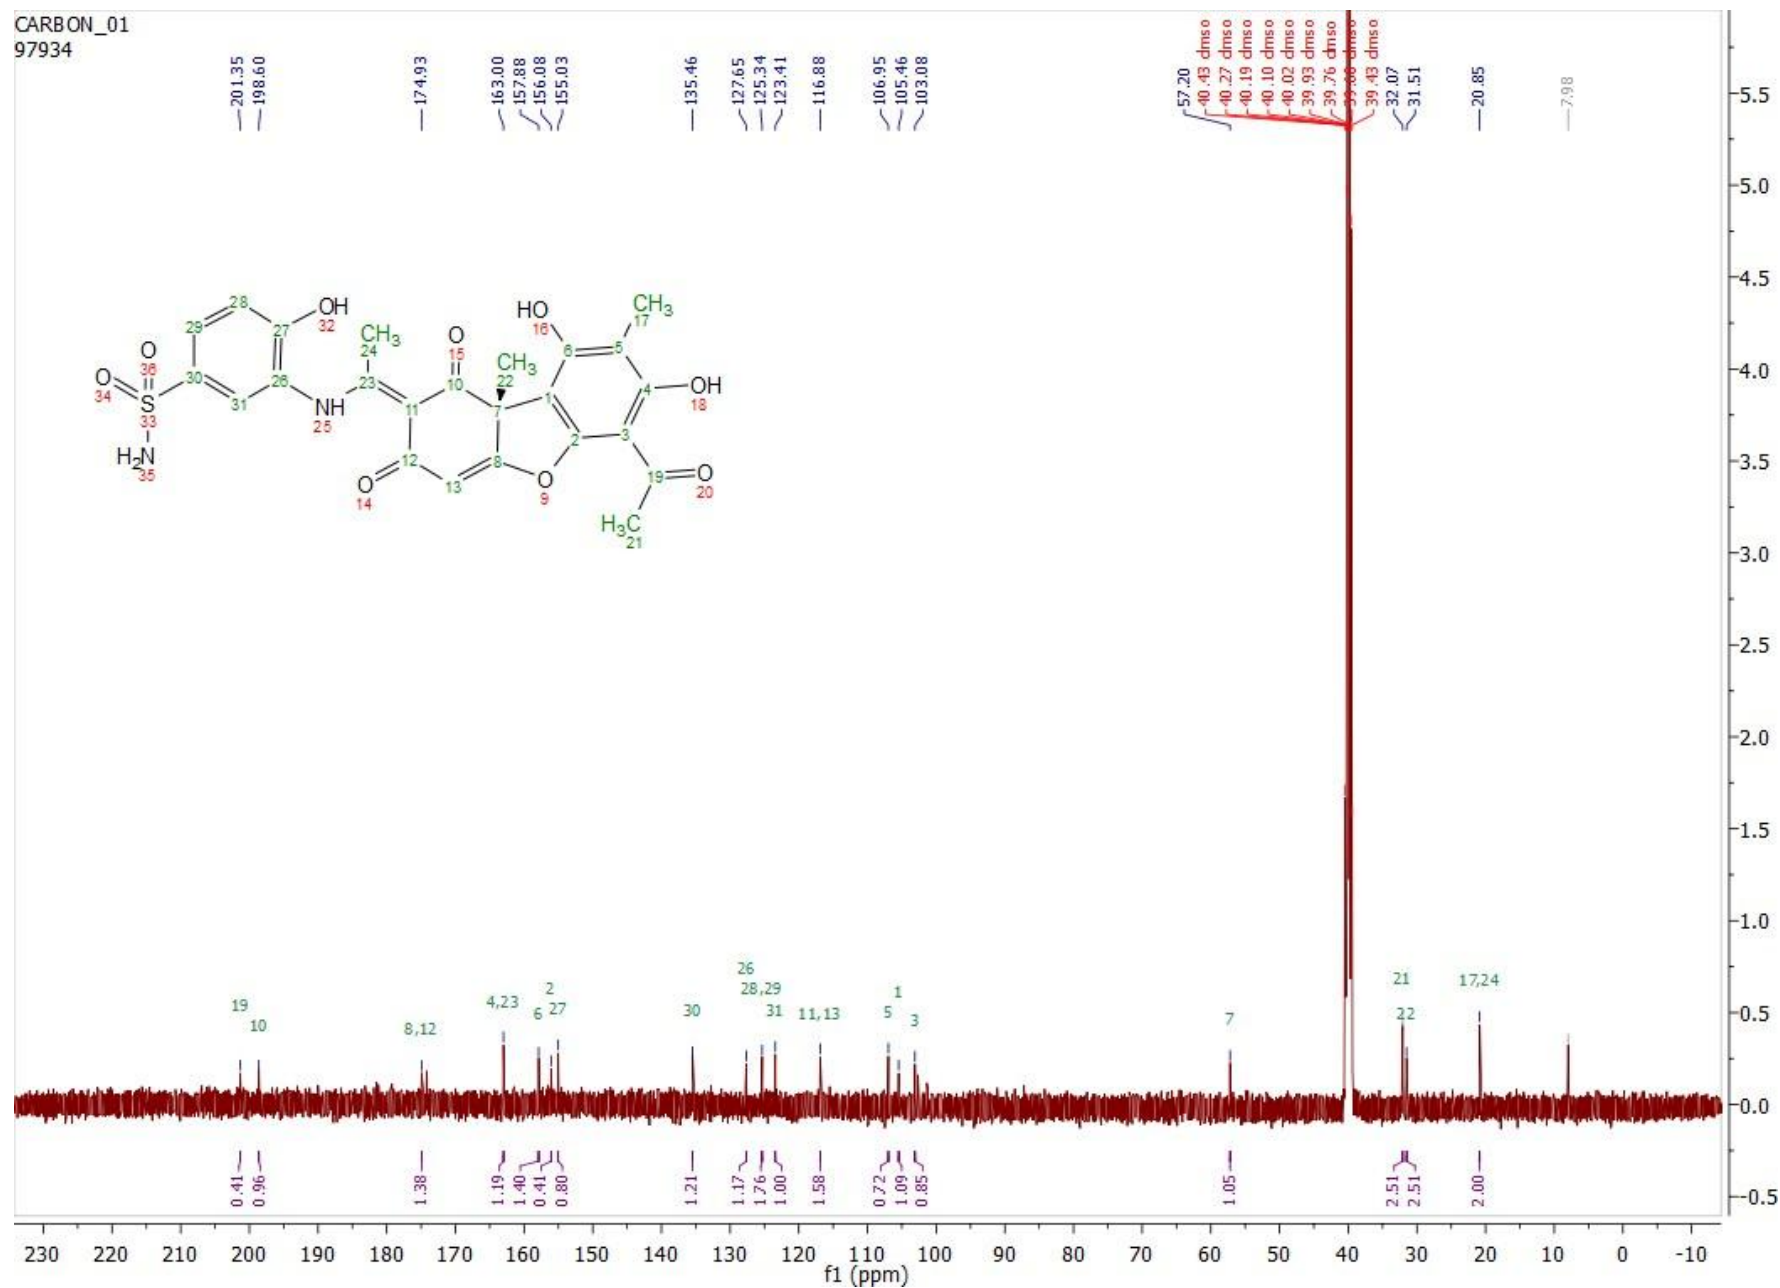

## 2. Preliminary docking studies

**Table S1.** Molecular docking free binding energies (kcal/mol) and interactions of designed compounds on hCA I, II and IX isoforms.

| Structure | hCA isoform | Estimated free binding energy (Kcal/mol) | Structure | hCA isoform | Estimated free binding energy (Kcal/mol) |
|-----------|-------------|------------------------------------------|-----------|-------------|------------------------------------------|
|           | hCA I       | -3.20                                    |           | hCA I       | -2.67                                    |
|           | hCA II      | -4.64                                    |           | hCA II      | -2.85                                    |
|           | hCA IX      | -3.16                                    |           | hCA IX      | -4.32                                    |
|           | hCA I       | -3.71                                    |           | hCA I       | -3.60                                    |
|           | hCA II      | -4.50                                    |           | hCA II      | -4.16                                    |
|           | hCA IX      | -3.62                                    |           | hCA IX      | -5.30                                    |
|           | hCA I       | -4.88                                    |           | hCA I       | -4.95                                    |
|           | hCA II      | -4.13                                    |           | hCA II      | -3.24                                    |
|           | hCA IX      | -5.57                                    |           | hCA IX      | -3.45                                    |
|           | hCA I       | -4.29                                    |           | hCA I       | -3.87                                    |
|           | hCA II      | -5.74                                    |           | hCA II      | -4.11                                    |
|           | hCA IX      | -5.18                                    |           | hCA IX      | -5.46                                    |
|           | hCA I       | <b>-6.72</b>                             |           | hCA I       | <b>-6.25</b>                             |
|           | hCA II      | <b>-10.23</b>                            |           | hCA II      | <b>-6.24</b>                             |
|           | hCA IX      | <b>-6.57</b>                             |           | hCA IX      | <b>-8.38</b>                             |
|           | hCA I       | <b>-5.11</b>                             |           | hCA I       | <b>-5.49</b>                             |
|           | hCA II      | <b>-4.89</b>                             |           | hCA II      | <b>-7.38</b>                             |

|                                                                                     |        |        |                                                                                       |        |        |
|-------------------------------------------------------------------------------------|--------|--------|---------------------------------------------------------------------------------------|--------|--------|
|                                                                                     | hCA IX | -6.26  |                                                                                       | hCA IX | -6.30  |
| 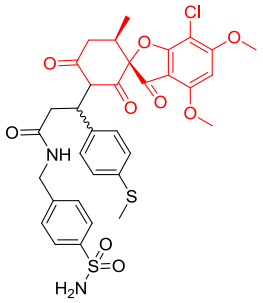   | hCA I  | -6.13  |    | hCA I  | -9.67  |
|                                                                                     | hCA II | -7.39  |                                                                                       | hCA II | -10.38 |
|                                                                                     | hCA IX | -6.88  |                                                                                       | hCA IX | -7.70  |
|    | hCA I  | -9.67  |    | hCA I  | -10.35 |
|                                                                                     | hCA II | -9.85  |                                                                                       | hCA II | -12.02 |
|                                                                                     | hCA IX | -7.32  |                                                                                       | hCA IX | -8.53  |
|   | hCA I  | -6.28  |   | hCA I  | -5.76  |
|                                                                                     | hCA II | -5.89  |                                                                                       | hCA II | -6.78  |
|                                                                                     | hCA IX | -8.52  |                                                                                       | hCA IX | -8.36  |
|  | hCA I  | -12.45 |  | hCA I  | -8.28  |
|                                                                                     | hCA II | -11.64 |                                                                                       | hCA II | -12.87 |
|                                                                                     | hCA IX | -12.74 |                                                                                       | hCA IX | -12.02 |
| <b>AAZ</b>                                                                          | hCA I  | -8.28  |                                                                                       |        |        |

|        |       |
|--------|-------|
| hCA II | -8.87 |
| hCA IX | -9.02 |

### 3. Prediction of toxicity

**Table S2.** Prediction of toxicity.

| No | Predicted LD50 (mg/kg) | Predicted Toxicity Class | Hepatotoxicity  | Carcinogenicity | Mutagenicity    | Cytotoxicity    |
|----|------------------------|--------------------------|-----------------|-----------------|-----------------|-----------------|
| 1a | 1100                   | IV                       | Inactive (0.55) | Inactive (0.58) | Inactive (0.57) | Inactive (0.60) |
| 1b | 2000                   | IV                       | Inactive (0.54) | Inactive (0.61) | Inactive (0.67) | Inactive (0.74) |
| 1c | 1100                   | IV                       | Inactive (0.53) | Inactive (0.62) | Inactive (0.64) | Inactive (0.66) |
| 1d | 2000                   | IV                       | Inactive (0.54) | Inactive (0.60) | Inactive (0.68) | Inactive (0.73) |
| 1e | 3500                   | V                        | Inactive (0.55) | Inactive (0.59) | Inactive (0.67) | Inactive (0.64) |
| 1f | 3500                   | V                        | Inactive (0.55) | Inactive (0.61) | Inactive (0.66) | Inactive (0.65) |
| 1g | 1100                   | IV                       | Inactive (0.55) | Inactive (0.60) | Inactive (0.63) | Inactive (0.60) |
| 1h | 5000                   | V                        | Inactive (0.52) | Inactive (0.62) | Inactive (0.69) | Inactive (0.64) |
| 1i | 5000                   | V                        | Inactive (0.53) | Inactive (0.63) | Inactive (0.68) | Inactive (0.64) |
| 1j | 5000                   | V                        | Inactive (0.56) | Inactive (0.63) | Inactive (0.68) | Inactive (0.64) |
| 4a | 838                    | IV                       | Inactive (0.54) | Inactive (0.58) | Inactive (0.67) | Inactive (0.74) |
| 4b | 838                    | IV                       | Inactive (0.54) | Inactive (0.58) | Inactive (0.67) | Inactive (0.74) |

Number in brackets indicate possibilities.

### 4. Molecular Docking Studies

#### Software Used

The ligand preparations done by using chemdraw 12.0, geometries were optimized using LigandScout 4.4.5. The "Build/check/repair model" to the session "Prepare PDB file for docking programs" module was used for proteins preparation. For the finally preparation of both ligands and protein preparation Wizard of AutoDock tools 1.5.6 are used. Autodock 4 (ver. 4.2.6) was employed for docking simulations and Autogrid4 for affinity grid maps preparation [1]. The resulting poses and potential interactions were visualized using the LigandScout 4.4.5 program.

#### Protein and ligand preparation

X-ray crystal structures of *hCA I* (PDB code 3W6H) and *hCA II* (PDB code 3HS4) cytosolic isoforms as well as *hCA IX* (PDB code 3IAI) transmembrane tumor-associated isoform were retrieved from Brookhaven Protein Data Bank (PDB) [2]. The pdb files of proteins were submitted to "Build/check/repair model" to the session "Prepare PDB file for docking programs" and missing side chains were modeled in, water positions and symmetry were corrected, and hydrogen atoms were added. Only chain A of each enzyme of the repaired pdb file was evaluated and passed to AutodockTools (ADT ver.1.5.6) for pdbqt file preparation. ADT assigned polar hydrogens, water molecules and non-standard residues were removed, only polar hydrogen was maintained, and Gasteiger charges were computed for protein atoms. AutoDock saved the prepared file in PDBQT format.

All the molecules were sketched in chemdraw 12.0 program. The geometry of built compounds was optimized using the molecular mechanical force fields 94 (MMFF94) energy via program LigandScout, partial charges were also calculated, conformers of each ligand were generated and the one with the best conformation was maintained and saved as mol2 files that were passed, as usual, to ADT for pdbqt file preparation. There, polar hydrogen was added to each structure, followed by computing Gasteiger and Kollman charges, and the torsions.

### Docking Procedure

Autodock4 (ver. 4.2.6) was employed for docking simulations. A computationally (relatively) 'hybrid' force field that contains terms based on molecular, mechanics and empirical terms is used by AutoDock. The evaluation step in a nutshell includes: first, calculation of the energy of protein and ligand in the unbound state. Second, calculation of the energy of the ligand-protein complex and take the difference between first and second step.

$$\Delta G = (V_{\text{bound}}^{L-L} - V_{\text{unbound}}^{L-L}) + (V_{\text{bound}}^{P-P} - V_{\text{unbound}}^{P-P}) + (V_{\text{bound}}^{P-L} - V_{\text{unbound}}^{P-L} + \Delta S_{\text{conf}})$$

where P refers to the protein, L refers to the ligand, V are the pair-wise evaluations mentioned above and  $\Delta S_{\text{conf}}$  denotes the loss of conformational entropy upon binding [3]. The ligand molecule is in an arbitrary conformation, orientation and position and this molecular docking program finds favorable poses in a protein-binding site using Lamarckian genetic algorithms implemented therein to search for the best conformers.

Lamarckian genetic algorithm was used as search engine, with a total of 100 runs. The region of interest, used by Autodock4 for docking runs and by Autogrid4 for affinity grid maps preparation, was defined in such a way to comprise the whole catalytic binding site using a grid of 50 x 50 x 50 points with a grid space of 0.375 Å. All parameters used in docking were default. The translation, quaternion and torsions steps were taken from default values in AutoDock. The Lamarckian genetic algorithm and the pseudo-Solis and Wets methods were applied for minimization using default parameters. The number of docking runs was 100. After docking, the 100 solutions were clustered into groups with RMS lower than 1.0 E. The clusters were ranked by the lowest energy representative of each cluster. Upon completion of docking, the best poses were screened by examination of binding energy ( $\Delta G_{\text{binding}}$ , kcal/mol) and number in cluster. In order to describe the ligand-binding pocket interactions, the top ranked binding mode found by AutoDock in complex with the binding pocket of enzyme was selected. The resulting poses and potential interactions were visualized using the LigandScout 4.4.5. Finally, the docking protocol was verified by re-docking of the co-crystallized ligand acetazolamide (AAZ) in the vicinity of the active sites of each enzyme with RMSD values 0.885, 0.966 and 1.034 Å for *hCA I*, *II* and *IX*, respectively.

1. Morris, G. M., Huey, R., Lindstrom, W., Sanner, M. F., Belew, R. K., Goodsell, D. S. and Olson, A. J. (2009) Autodock4 and AutoDockTools4: automated docking with selective receptor flexibility. *J. Computational Chemistry* **2009**,16: 2785-91.
2. <http://www.rcsb.org/>. (Accessed 19/6/2021).
3. R. Huey, G.M. Morris, A.J. Olson, and D.S. Goodsell, A semiempirical free energy force field with charge-based desolvation, *J. Comp. Chem.* **28** (2007), pp. 1145–1152.
